1 **The glycine locating at random coil of picornaviruses VP3**  
2 **enhances viral pathogenicity by targeting p53 to promote**  
3 **apoptosis and autophagy**

4  
5 **Gly129 of picornaviruses VP3 enhances viral pathogenicity**

6  
7 Ruoqing Mao<sup>1</sup>, Fan Yang<sup>1</sup>, Dehui Sun<sup>1</sup>, Xiaoli Zhou<sup>1</sup>, Zixiang Zhu<sup>1</sup>, Xuan Guo<sup>2</sup>, Huanan Liu<sup>1</sup>,  
8 Hong Tian<sup>1</sup>, Keshan Zhang<sup>1</sup>, Wen Dang<sup>1</sup>, Qingfeng Wu<sup>3</sup>, Xinwen Ma<sup>3</sup>, Xiangtao Liu<sup>1</sup> and  
9 Haixue Zheng<sup>1\*</sup>

10 <sup>1</sup> State Key Laboratory of Veterinary Etiological Biology, National Foot and Mouth Diseases  
11 Reference Laboratory, Key Laboratory of Animal Virology of Ministry of Agriculture, Lanzhou  
12 Veterinary Research Institute, Chinese Academy of Agricultural Sciences, Lanzhou, P. R.  
13 China;

14 <sup>2</sup> State Key Laboratory of Genetically Engineered Veterinary Vaccines Yebio Bioengineering  
15 Co., Ltd of Qingdao 21 South Aodong Road, Hongdao Economic Zone, Qingdao, P. R. China;

16 <sup>3</sup> Analysis and Test Group, Center for Technical Development and Analysis Service, Institute of  
17 Modern Physics, Chinese Academy of Sciences, Lanzhou, P. R.China.

18

19 \*Correspondence Author

20 Prof. Dr. Haixue Zheng

21 Tel: +86-931-8342086

22 Fax: +86-931-8342710,

23 Email: haixuezheng@163.com

24

25 Present Address: Lanzhou Veterinary Research Institute

26 Chinese Academy of Agricultural Science

27 No. 1, Xujiaping Road, Lanzhou, 730046, PR China

28

## 29 **ABSREACT**

30 Picornaviruses, comprising important and widespread pathogens of humans and animals,  
31 have evolved to control apoptosis and autophagy for their replication and spread. However,  
32 the underlying mechanism of the association between apoptosis/autophagy and viral  
33 pathogenicity remains unclear. In the present study, VP3 of picornaviruses was demonstrated  
34 to induce apoptosis and autophagy. Foot-and-mouth disease virus (FMDV), which served as a  
35 research model here, can strongly induce both apoptosis and autophagy in the skin lesions. By  
36 directly interacting with p53, FMDV-VP3 facilitates its phosphorylation and translocation,  
37 resulting in Bcl-2 family-mediated apoptosis and LC3-dependent autophagy. The single  
38 residue Gly129 of FMDV-VP3 plays a crucial role in apoptosis and autophagy induction and  
39 the interaction with p53. Consistently, the comparison of rescued FMDV with mutated Gly129  
40 and parental virus showed that the Gly129 is indispensable for viral replication and  
41 pathogenicity. More importantly, the Gly129 locates at a bend region of random coil structure,  
42 the mutation of Gly to Ala remarkably shrunk the volume of viral cavity. Coincidentally, the Gly  
43 is conserved in the similarly location of other picornaviruses, including poliovirus (PV),  
44 enterovirus 71 (EV71), coxsackievirus (CV) and seneca valley virus (SVA). This study  
45 demonstrates that picornaviruses induce apoptosis and autophagy to facilitate its  
46 pathogenicity and the Gly is functional site, providing novel insights into picornavirus biology.

## 47 **INTRODUCTION**

48 Viral pathogenicity is frequently associated with the ability of the virus to kill host cells.  
49 Apoptosis, type I cell death and the main and most typical pattern of cell death, can be  
50 induced or inhibited by viral infection. In order to inhibit viral replication and dissemination, the  
51 host's immune system immediately responds to viral invasion by initiating self-destructive  
52 apoptosis to curtail infection as an effective innate response. Viruses, however, have evolved  
53 a variety of strategies to regulate and control apoptosis in the host to ensure their continuous  
54 replication and release (1, 2). Apoptosis can be triggered by two main signaling pathways  
55 (intrinsic and extrinsic) regulated by various factors at multiple levels. The type II cell death  
56 is known as autophagic cell death (3). The relation between autophagy and virus is intricate.  
57 As an antiviral mechanism, autophagy proteins can influence innate and adaptive immune

58 response, resulting in autophagy-mediated viral degradation and ultimately inhibit viral  
59 replication and release. Also, in some cases autophagy as a cellular survival mechanism limits  
60 virus-induced apoptosis, to protect neighboring uninfected cells (4, 5). In contrast to antiviral  
61 function, the autophagosome with cellular membranous structure as a platform for the  
62 replication and translation of viral membrane-associated replication factories, can promote  
63 viral replication (6-8).

64 The relationship between apoptosis and autophagy is complicated, and in some scenarios  
65 they crosstalk with each other via several molecular nodes, such as target of rapamycin (TOR),  
66 Beclin 1, caspase, Flice inhibitory protein (FLIP), death-associated protein kinase (DAPK) and  
67 p53 (9, 10). The p53 tumor suppressor is considered a crucial mediator of apoptosis,  
68 autophagy, cell cycle, metabolism and senescence in response to stimulating stresses (11, 12).  
69 It can be activated by internal and external stimuli that promotes its accumulation in a stable  
70 and activated form by phosphorylation, acetylation or SUMOylation. The stabilized p53 in turn  
71 regulates many pro-apoptotic genes such as Bax, Bad, Bid, Fas, and PUMA (13). In recent  
72 years, several reports have focused on the relationship between p53 and autophagy. p53 can  
73 target DRAM and Isg20L1 to activate autophagy or enhance mTOR activity to inhibit  
74 autophagy (14). Conversely, autophagy represses p53 by suppressing oxidative stress or  
75 preventing DNA damage.

76 Picornaviruses comprise a large number of non-enveloped small RNA viruses, including  
77 hepatitis A virus (HAV), poliovirus (PV), foot-and-mouth disease virus (FMDV), enterovirus 71  
78 (EV71), coxsackievirus (CV) and seneca valley virus (SVA), which are important pathogens of  
79 humans and animals (15). The single positive-stranded RNA genome of picornaviruses  
80 consists of a single open reading frame (ORF) encoding a polyprotein that is  
81 post-translationally processed into four structural proteins (VP1, VP2, VP3 and VP4) and eight  
82 non-structural proteins (Lpro, 2A, 2B, 2C, 3A, 3B, 3C, and 3Dpol) (15). As other viruses,  
83 picornaviruses have evolved to control apoptosis for viral replication and spread (16, 17).  
84 Coxsackievirus 2A protease can cleave DAP5 to enhance viral replication and apoptosis (18).  
85 The PV 3A protein inhibits TNF-induced apoptosis (19). 3C can induce apoptosis in  
86 PV-infected cells by caspase activation (20). EV71 2B enhances apoptosis by inducing  
87 conformational activation of BAX (21). 3C enhances apoptosis by Pinx1 cleavage (22).

88 Autophagy also plays important roles in picornaviruses infection or replication. EV71 induced  
89 autophagy promotes viral replication (23), and the promyelocytic leukemia (PML) represses  
90 EV71 replication by inhibiting autophagy (24). PV proteins 2BC and 3A are contributing to the  
91 modification of LC3 (25).

92 The FMDV is another well-known etiological agent belonging to the genus Aphthovirus in the  
93 Picornaviridae family; its associated disease is notorious for colossal and disastrous impacts  
94 on livestock characterized by fever, lameness and vesicular lesions (26). The FMDV causes  
95 cytopathic effects (CPE) in infected host cells, with dramatic structural and morphological  
96 changes, which underlie viral pathogenicity without clearing mechanisms (26, 27).  
97 Concomitant with CPE, cell death is commonly observed in infected cells. There are only two  
98 proteins, VP1 and 2C, which have been proven to play important roles in FMDV-induced  
99 cellular apoptosis (28-30). VP2 interacts with HSPB1 to induce autophagy and enhance viral  
100 replication (31). However, how host apoptosis and autophagy affect viral pathogenicity is  
101 unclear. In this study, we firstly identified and demonstrated the structural protein VP3 of PV,  
102 FMDV and SVA as novel proteins inducing apoptosis and autophagy. To understand the  
103 further mechanism, taking FMDV as a model and FMDV-VP3 was shown to directly interact  
104 with p53, facilitating p53 phosphorylation, translocation into the mitochondria and interaction  
105 with Bad, which result in cytochrome c-mediated apoptosis and LC3-dependent autophagy.  
106 Furthermore, the single residue Gly129 of VP3 was essential for the VP3- and FMDV- induced  
107 apoptosis and autophagy, as well as the interaction between VP3 and p53. Meanwhile,  
108 apoptosis and autophagy were shown to be a critical mechanism promoting FMDV replication  
109 and pathogenesis. More importantly, three dimensional (3D) structure models showed that the  
110 mutation of Gly to Ala remarkably shrunk the volume of viral cavity. Coincidentally, at the  
111 similar location of other picornaviruses, including CV, EV71, SVA and PV, Gly is conservative.  
112 All data indicate that the ability of cell death induction may be conserved amongst  
113 picornaviruses and this may depend on the conservative structure of VP3.

## 114 **MATERIALS AND METHODS**

115 **Cells and viruses.** The hTERT-BTY cell line was established from primary bovine thyroid

116 (BTY) cells in our laboratory (Invention Patent, China, ZL201410421962.4. CCTCC,  
117 C2014109) (32). The cells were cultured in Dulbecco's Modified Eagle Medium/Nutrient  
118 Mixture F-12 (DMEM/F12; Gibco) supplemented with 10% fetal bovine serum (Gibco), 10  
119  $\mu\text{g}/\text{mL}$  insulin, 100 U/mL penicillin and 100  $\mu\text{g}/\text{mL}$  streptomycin (Sigma). The baby hamster  
120 kidney (BHK-21, ATCC, CCL-10), porcine kidney epithelial (PK-15, ATCC, CCL-33) and  
121 human embryonic kidney 293T (HEK293T, ATCC, CRL-3216) cell lines were maintained in  
122 minimum essential medium (MEM) supplemented with 10% fetal bovine serum (Gibco) and  
123 100 U/mL of penicillin-streptomycin. All cells were cultured at 37°C in a humid environment  
124 with 5% CO<sub>2</sub>. The mycoplasma test was performed to ensure that the cell lines were  
125 mycoplasma-free.

126 Type O FMDV strain O/BY/CHA/2010 (GenBank: JN998085.1) was obtained from the  
127 Chinese National Reference Laboratory for Foot and Mouth Diseases, and propagated in  
128 BHK-21 cells. Viral infection was performed according to the standard procedure(33). Then,  
129 hTERT-BTY cells at 90% confluence were infected with FMDV; after 1h adsorption at 37°C, the  
130 cells were washed twice with PBS and cultured continuously in MEM without FBS at 37°C and  
131 5% CO<sub>2</sub>.

132 **Reagents, plasmids and antibodies.** Cell apoptosis was analyzed with an Annexin  
133 V-FITC/propidium iodide (AnnV/PI) apoptosis assay kit (Invitrogen, Carlsbad, CA).  
134 Mitochondrial membrane potential was analyzed with a Mitoprobe™ JC-1 Assay kit  
135 (Invitrogen). Nuclear condensation was assessed by staining with the Hoechst® dye  
136 (Invitrogen). The full-length cDNAs of type O FMDV strain proteins were respectively cloned  
137 into the pCAGGS-Flag vector to express viral proteins in eukaryotic expression plasmids. A  
138 series of truncated or mutated VP3 plasmids were generated by site-directed mutagenesis  
139 PCR. The VP3 of PV (GenBank: FJ769385.1) and SVA (GenBank: KY747510.1) were  
140 respectively cloned into the pCMV-Flag vector to express viral proteins in eukaryotic  
141 expression plasmids. The human caspases 3, 7 and 8, and JNK, AKT, P53, Bad, Bid, Bax,  
142 Bcl-2 and XIAP were cloned into pCDNA 3.1-Myc or pCMV-HA. Antibodies specific for  $\beta$ -actin  
143 (sc-47778), caspase-3 (sc-1225), 8 (sc-6139), caspase-9 (sc-7885), Bax (sc-493), Bcl-2

144 (sc-492), Cyto-c (sc-7159), AKT (sc-8312), JNK (sc-571), Bad (SC-8044,  
145 immunofluorescence), p53 (sc-99) and p-p53 (sc-51690) were purchased from Santa Cruz  
146 Biotechnology (Santa Cruz, CA, USA). Antibodies specific for Cox IV (ab14744), Bad  
147 (ab90435), p53 (ab61241, immunofluorescence), mouse or rabbit antibodies specific for HA  
148 (ab1424), Flag (ab1162) and Myc (ab32) were purchased from Abcam (Abcam, Cambridge,  
149 UK). Antibodies specific for LC3 (PM036) were purchased from MBL (MBL, JP). Polyclonal  
150 antibodies specific for O type FMDV and monoclonal antibodies targeting O type FMDV-VP3  
151 were prepared by our laboratory (unpublished data).

152 **Apoptosis assay, mitochondrial membrane potential detection and measurement of**  
153 **nuclear condensation.** Early and late stage cell apoptotic events were analyzed by AnnV/PI  
154 staining. The externalized phospholipid phosphatidylserine, a typical marker of cells  
155 undergoing apoptosis, is stained by Annexin V-FITC, whereas PI binds the DNA of late  
156 apoptotic and necrosis cells.

157 Cells were seeded in 6-well plates and cultured to 90% confluence. After viral infection or  
158 transfection, cells were detached by trypsin without EDTA at different time points. All cells  
159 including those in the supernatant were collected and resuspended in binding buffer at a  
160 density of  $1 \times 10^6$  cells/mL. The cell suspensions were stained with Annexin V-FITC and PI at 4°C  
161 in the dark, and fluorescence was measured by flow cytometry. Ten thousand cells in each  
162 sample were analyzed.

163 The disruption of active mitochondria, causing membrane potential changes and alterations  
164 of the oxidation-reduction potential, is a distinctive characteristic of early apoptosis. The  
165 membrane-permeant JC-1 dye is commonly used in apoptosis assays. After viral infection or  
166 plasmid transfection, the cells were stained with 2µM JC-1 for 15 min at 37°C, 5% CO<sub>2</sub>. Then,  
167 the cells were washed with PBS and analyzed by flow cytometry with excitation at 488 nm and  
168 emission at 530 nm and 585 nm, respectively.

169 Hoechst dye is often used to observe condensed pycnotic nuclei in apoptotic cells. After  
170 plasmid transfection or viral infection, the cells were fixed with 4% paraformaldehyde,  
171 incubated with Hoechst 33342 staining solution for 5-10 minutes, washed three times with

172 PBS, and subjected to analysis by fluorescence microscopy.

173 **Western blot, immunofluorescence and Co-immunoprecipitation.** Total protein from cells  
174 was extracted with cell lysis buffer for Western blot and IP (Beyotime, Shanghai, China). Equal  
175 amounts of total protein were resolved by SDS-PAGE and transferred onto a PVDF membrane  
176 (Millipore). The membrane was then blocked with horse blocking buffer (bioWORLD, USA)  
177 and sequentially incubated with specific primary and secondary antibodies. Enhanced  
178 chemiluminescence detection reagents (Thermo) were used to visualize target proteins.

179 For immunofluorescence, cells were grown on confocal dishes and transfected with various  
180 plasmids. The Mitochondrion-selective probe (GeneCopoeia, Rockville, USA) was used to  
181 stain cell mitochondria according to the manufacturer's instructions. After staining, the cells  
182 were fixed with 4% paraformaldehyde (Sigma) for 1 h. After three PBS washes, the cells were  
183 permeabilized with 0.1% Triton-100 (Sigma) for 20 min at room temperature and blocked with  
184 5% BSA for 1 h at 37°C. The specimens were next incubated with primary antibodies followed  
185 by fluorochrome-conjugated secondary antibodies. Finally, the cells were incubated with  
186 DAPI-Fluoromount-G (Solarbio, Beijing, China) and visualized under a confocal laser scanning  
187 microscope (TSC SP5 Leica).

188 Co-immunoprecipitation assays were performed as described previously (34). Briefly, the  
189 cells were co-transfected with the indicated plasmids. Then, they were lysed and incubated  
190 with various monoclonal antibody-conjugated agarose beads, respectively, overnight at 4°C  
191 on a rotary vibrator. The beads were washed with lysis buffer three times and boiled. Proteins  
192 in the supernatants were analyzed by Western blot.

193 **Real-time PCR.** One step quantitative real-time RT-PCR (rRT-PCR) was performed to detect  
194 viral RNA as described previously.(35, 36) A conserved region in the FMDV 3D gene was  
195 chosen for primer and TaqMan probe design. Total RNA was extracted with TRIzol Reagent  
196 (Invitrogen) and One Step Primescript TM RT-PCR Kit was used to determine FMDV copies.  
197 The experiments were performed at least three times, and a threshold cycle (CT) value was  
198 assigned to each PCR reaction. Then, standard curves showing a linear relationship between

199 CT and FMDV copies were established to quantify FMDV.

200 **Construction of apoptotic site-mutated recombinant viruses.** Based on the  
201 reverse-genetics system established in our laboratory (37, 38), we constructed an infectious  
202 cDNA of O/CHA/99, termed pO-FMDV. The P1 coding sequence of O/BY/CHA/2010 was  
203 selected as the site for exchange with the corresponding region of pO-FMDV using the  
204 restriction endonucleases AflII and ClaI (New England Biolabs, Ipswich, Massachusetts, USA);  
205 the recombinant plasmid was named prVP3/FMDV. Site-directed mutagenesis performed with  
206 specific primers (VP3-129-F, 5'-GCCCCTCCGGCTATGGAGCCGCCCAAACAC-3';  
207 VP3-129-R, 5'-CGGCTCCATACGCGGAGGGGCATACGCAATC-3') was used to mutate VP3  
208 Gly129 to Ala. The positive plasmid with the VP3 G129A substitution was digested with AflII  
209 and ClaI, and reintroduced into the pO-FMDV vector, producing the recombinant plasmid  
210 PrVP3-129/FMDV. Sequencing and purification of the above resulting plasmids were  
211 performed as described previously (33).

212 The purified plasmids were extracted with NucleoBond® Xtra Maxi Kit (Macherey-Nagel,  
213 Düren, Germany), and transfected into BHK-21 cells with Lipofectamine™ 2000 (Invitrogen,  
214 Carlsbad, CA) following the manufacturer's protocol. The supernatants were harvested after  
215 48 h and subjected to three freeze-thaw cycles. Then, the viruses recovered from the  
216 abovementioned supernatants were harvested by centrifugation at 5,000×g for 10 min at 4°C,  
217 and passaged 30 times in BHK-21 cells. The recombinant viruses were stored at -80°C for  
218 future use.

219 **Virus internalization.** hTERT-BTY and PK-15 cells ( $5 \times 10^5$  cells/well) were infected with the  
220 two rescued viruses at a dose of  $1 \times 10^8$  viral genomic RNA copies for 1 h at 37°C, and  
221 unabsorbed viruses were washed with ice-cold Hanks balanced salt solution (HBSS) three  
222 times. To remove surface-bound viruses, the cells were digested with trypsin-EDTA (GIBCO)  
223 for 5 min, and washed three times with HBSS.

224 **Virus titration and plaque assay.** The plaque assay was performed as described



225 previously.(35) Cells were seeded in 6-well plates and cultured to 90% confluence. Then,  
226 10-fold dilutions of viruses were inoculated into the cells. The medium was removed after 1 h  
227 of adsorption, and cells were overlaid with 50% 2×MEM supplemented with 2% FBS and 50%  
228 Tragacanth. The cells were incubated at 37°C for 48 h, fixed with methanol and acetone (1:1),  
229 and stained with crystal violet (Sigma).

230 **Hydrophobicity prediction and homology modeling.** The ExpASY-ProtScale tool  
231 (<https://web.expasy.org/protscale/>) was used to predicate the Kyte & Doolittle hydrophobicity  
232 of viral proteins. The SWISS MODEL (<http://swissmodel.expasy.org/>) was used for 3D protein  
233 structure predicting. 3D structure of the mutated VP3 was generated by PyMOL software.

234 **Guinea pig challenge experiments.** Animal experiments were performed at the Biosafety  
235 Level 3 laboratory of LVRI, Chinese Academy of Agricultural Sciences (Permission number:  
236 SYXK-GAN-2004-0005). All animal experiments were approved by the Gansu Animal  
237 Experiments Inspectorate and the Gansu Ethical Review Committee (License no. SYXK [GAN]  
238 2010–003). Animals in this study were humanly treated and euthanized by injection of sodium  
239 pentobarbital at the end of the experiments. Female Hartley guinea pigs, weighing 300-350 g  
240 and serologically negative for FMDV, were obtained from Lanzhou Veterinary Research  
241 Institute (China). The titers of the two rescued viruses were adjusted to 8.0 TCID<sub>50</sub>/mL.  
242 According to the principle of randomization, guinea pigs were divided into 16 groups (n=5 per  
243 group; this sample size meets the basic requirements for statistical analysis). Groups 1-8 were  
244 challenged intradermally and subcutaneously by footpad injection of a series of 10-fold  
245 dilutions from 0 (200µL undiluted virus/animal at a titer of 8.0 TCID<sub>50</sub>/mL) to -8 (200µL 10<sup>8</sup>-fold  
246 diluted virus/animal) of rVP3-129/FMDV per guinea pig. Groups 9-16 were challenged with  
247 rVP3/FMDV at the same dosage by the same procedure. All animals were assessed daily for  
248 signs of illness, and clinical signs were scored as follows by the double-blind method: no local  
249 red swelling and heat, 0; red swelling at the original injection site of one footpad, 1; red  
250 swelling at the original injection site of both footpads, 2; vesicles at one footpad, 3; red swelling  
251 at the original injection site of one footpad and vesicles at the other footpad, 4; vesicles at both

252 footpads, 5.

253 Heparinized blood samples were collected on days 0, 3, 6, 10 and 15 post-challenge,  
254 respectively, and serum antibodies against FMDV were measured with a guinea pig FMDV IgG  
255 ELISA kit (Jianglaibio, China, Shanghai) according to the manufacturer's instructions.

256 **Hematoxylin-eosin staining and the TUNEL-assay.** Guinea pigs were euthanized by  
257 intravenous injection of sodium pentobarbital. Then, postmortem examination was performed,  
258 and tissue samples (heart, liver, spleen, lung, kidney, mesenteric lymph nodes, submaxillary  
259 lymph nodes and pathologic tissues) were collected. All samples were fixed with 4%  
260 paraformaldehyde for at least 24 h, dehydrated, and paraffin embedded. The treated tissues  
261 were sectioned at 4 $\mu$ m and stained with hematoxylin and eosin (H&E).

262 To detect DNA fragmentation by labeling the 3' - hydroxyl termini in the double-strand DNA  
263 breaks generated during apoptosis, the TUNEL assay was performed with TUNEL Apoptosis  
264 Assay Kit (Roche). Briefly, slides were deparaffinized, rehydrated, and incubated with 20 $\mu$ g/mL  
265 proteinase K for 25 min at 37 $^{\circ}$ C for protein digestion. Then, the labeling mixture was added to  
266 the sections and incubated at 37 $^{\circ}$ C for 2 h, and sections were rinsed with PBS. After nuclear  
267 staining, the sections were covered with mounting medium. Finally, images were acquired on  
268 an imaging system (Pannoramic MIDI/P250, Hungary), and the percentage of apoptotic cells  
269 was determined with Image pro plus 6.0.

270 **Tissue immunohistochemistry and immunofluorescence.** Paraffin embedded tissues were  
271 sectioned at 2-3 $\mu$ m. Sections were dewaxed and pretreated as previously described (39). The  
272 blocked tissues were incubated with primary antibodies. For immunohistochemistry, the slides  
273 were incubated with biotinylated secondary antibodies, followed by DAB (ZSBIO, China)  
274 staining. Then, the slides were counterstained with Mayer's hematoxylin (ZSBIO, China). For  
275 immunofluorescence, the slides were incubated with fluorophore-conjugated secondary  
276 antibodies, and cell nuclei were stained with DAPI. Images were acquired under a BA200  
277 Digital microscope (Motic, China) or a confocal laser scanning microscope. Pearson's  
278 correlation analysis was performed with Image pro plus 6.0.

279 **Statistical analysis.** Student's t-test was performed using the SPSS 7.0 software. The level of  
280 significance is shown in figures.

## 281 **RESULTS**

### 282 **Predicting of FMDV, PV and SVA proteins identifies VP3 as inducer of apoptosis and** 283 **autophagy.**

284 The function of proteins to regulate cell death is often related to its hydrophobic regions. The  
285 ExPASy-ProtScale tool was used to predicate the hydrophobic features of FMDV, PV and  
286 SVA proteins. By synthesizing high hydropathicity score and number of amino acids with the  
287 top score, VP3 of above three viruses were chosen for further study (Figure 1A). Three  
288 dimensional structures of FMDV-VP, PV-VP3 and SVA-VP3 were predicated using  
289 SWISS-MODEL tool. The models show that the three VP3 proteins have similar structure  
290 (Figure 1B). To explore whether the above proteins regulate host cell death, the expression  
291 levels of cleaved caspase 3 and LC3 were examined in VP3 proteins-transfected HEK293T  
292 cells. The results showed that all three VP3 significantly promoted activation of caspase 3  
293 (Figure 1C) and upregulated LC3-II expression (Figure 1E). VP3-induced apoptosis was also  
294 verified by Annexin V-FITC/propidium iodide (AnnV/PI) staining and flow cytometry (Figure  
295 1D). These results show that VP3 of FMDV, PV and SVA can induce both apoptosis (type I  
296 cell death) and autophagy (type II cell death).

297

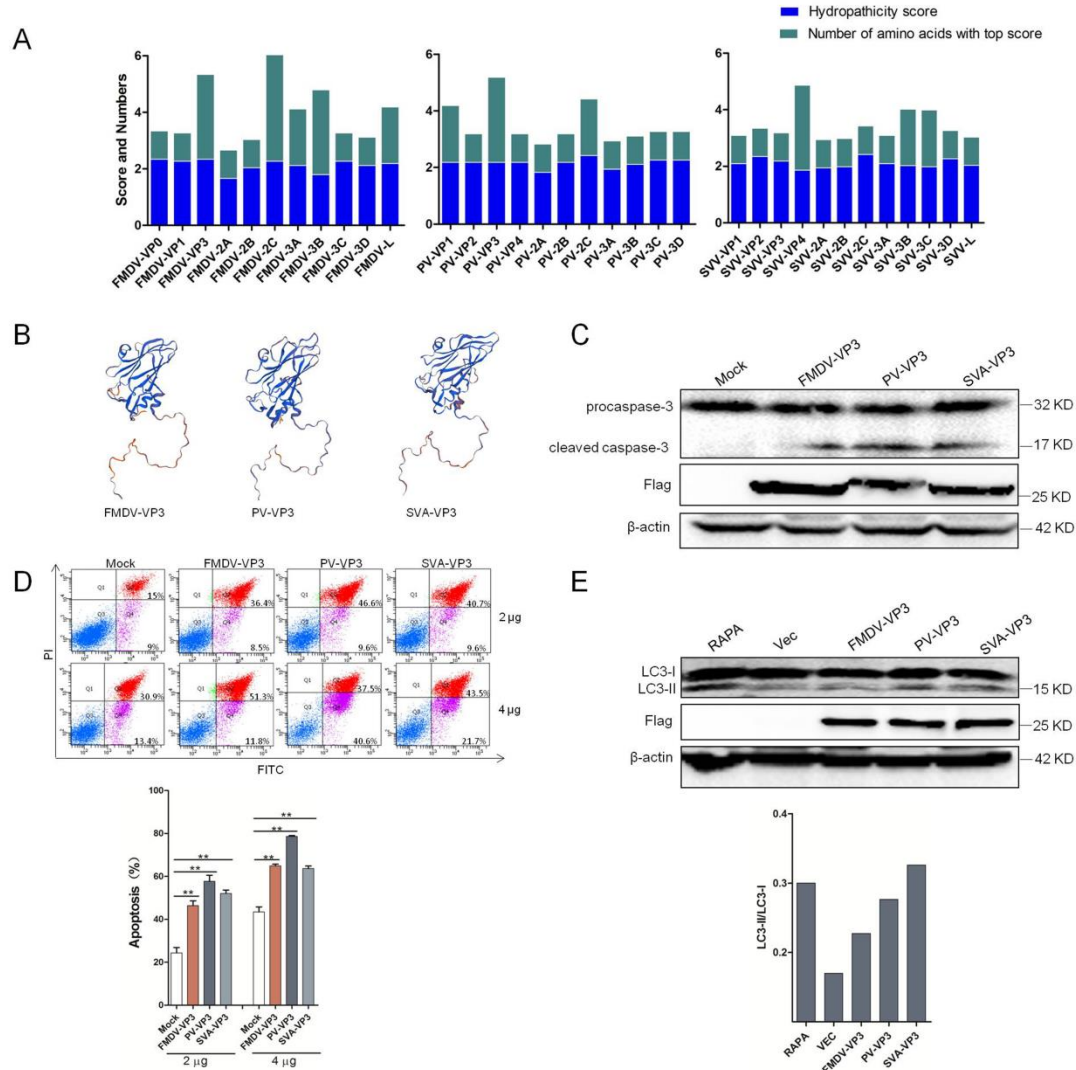

298

299 Figure 1. Prediction and identification of viral cell death regulation proteins. (A) Kyte & Doolittle  
300 hydrophobicity prediction of FMDV, PV and SVV proteins by ProtScale analysis at ExPASy. (B)  
301 Three dimensional structures of FMDV-VP3 (PDB ID: 4IV1), PV-VP3 (PDB ID: 5KUO) and  
302 SVA-VP3 (PDB ID: 6ADS) were predicted using SWISS-MODEL tool. (C) HEK-293T cells ( $10^5$   
303 cells/well) were transfected with empty vector or FMDV-, PV- and SVA-VP3. At 48 h.p.t., the  
304 expression levels of procaspase-3, cleaved caspase-3 and Flag-VP3 were detected by  
305 Western blot. (D) HEK-293T cells ( $10^5$  cells/well) were transfected with increasing quantities of  
306 empty vector or FMDV-, PV- and SVA-VP3 (2  $\mu$ g or 4  $\mu$ g). Apoptosis was detected by Annexin  
307 V-FITC/PI staining and FCM at 48 h.p.t.. (E) HEK-293T cells ( $10^5$  cells/well) were transfected  
308 with empty vector or FMDV-, PV- and SVA-VP3. At 48 h.p.t., the expression levels of LC3-I,  
309 LC3-II and Flag-VP3 were detected by Western blot and the gray intensities of LC3-II/LC3-I  
310 were analyzed. Data are mean  $\pm$  SD (n=3). Statistical significance was analyzed by Student's

12

311 t-test: \*P<0.05, \*\*P<0.01.

312 **FMDV infection induces apoptosis and autophagy in vivo.**

313 Cell death is commonly observed in FMDV-infected cells in vitro and in vivo. To confirm the  
314 type of FMDV-induced cell death, immunofluorescent staining on footpad lesions of  
315 FMDV-infected guinea pigs was performed. FMDV infection significantly upregulated the  
316 expression of LC3I/II and cleaved-caspase3 (Figure 2A). The images were further analyzed by  
317 HISTOQUEST software. The results showed that the percentage of LC3-I/II- and  
318 cleaved-caspase3-positive cells, whether in epidermis or dermis, was considerably higher in  
319 FMDV-infected guinea pig than PBS group. And the level of cleaved-caspase3 upregulation is  
320 more significant expressive than LC3I/II (Figure 2B). All these results indicate that FMDV can  
321 induce both apoptosis and autophagy in vivo, but the main type of cell death is apoptosis.

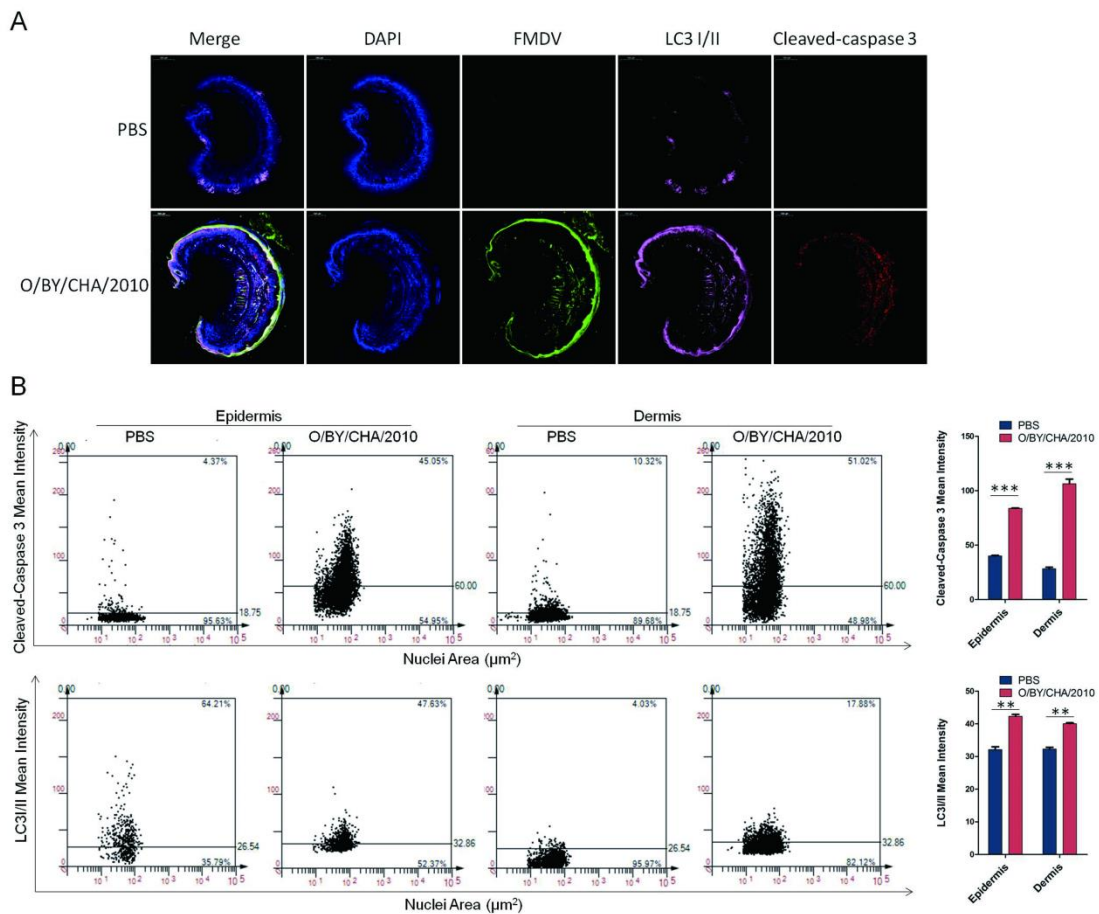

322

323 Figure 2. FMDV induces apoptosis and autophagy. (A) Guinea pigs were challenged with

324 FMDV (O/BY/CHA/2010, 8.0 TCID<sub>50</sub>/mL, 200µL/animal) or PBS. At 7 d.p.c., the lesions were

325 incubated with the indicated antibodies and examined by confocal microscopy. DAPI, blue;  
326 FMDV, green; cleaved-caspase3, red; LC3-I/II, pink. (B) The cleaved-caspase3 and LC3-I/II  
327 positive cells of epidermis and dermis were analyzed respectively by HISTOQUEST software.  
328 Data are mean  $\pm$  SD (n=3). Statistical significance was analyzed by Student's t-test: \*P<0.05,  
329 \*\*P<0.01, \*\*\*P<0.001; d.p.c., days post challenge.

### 330 **Verified VP3 protein of FMDV as a strong inducer of cellular apoptosis.**

331 For the reason that apoptosis is the main cell death type of FMDV-infected cells, viral  
332 apoptosis mechanisms were firstly studied. To investigate whether the FMDV could induce  
333 apoptosis in host cells in vitro, bovine thyroid (hTERT-BTY) cells were infected with  
334 O/BY/CHA/2010, and the FMDV caused clear CPE observed by light microscopy at 24 h  
335 post-infection (h.p.i.) as well as significant apoptosis analyzed by Annexin V-FITC/propidium  
336 iodide (AnnV/PI) staining and flow cytometry (Figure 3A). Next, all the FMDV proteins were  
337 screened for their abilities to induce apoptosis. Western blotting confirmed the successful  
338 expression of FMDV proteins (Figure 3B); among them, VP1, VP3 and 3A promoted apoptosis  
339 in hTERT-BTY cells at 24 and 48 h post-transfection (h.p.t.) (Figure 3C). The same  
340 phenomenon was observed in the porcine kidney epithelial PK-15 cell line. However, the baby  
341 hamster kidney BHK-21 cell line, a well-established cell line for FMDV propagation, was not an  
342 ideal model for apoptosis study due to its sensitivity to transfection; indeed, transfection of the  
343 vector also led to significant cellular apoptosis. Further, multifaceted approaches were used to  
344 evaluate the apoptosis-inducing activity of FMDV-VP3 (Figure S1).

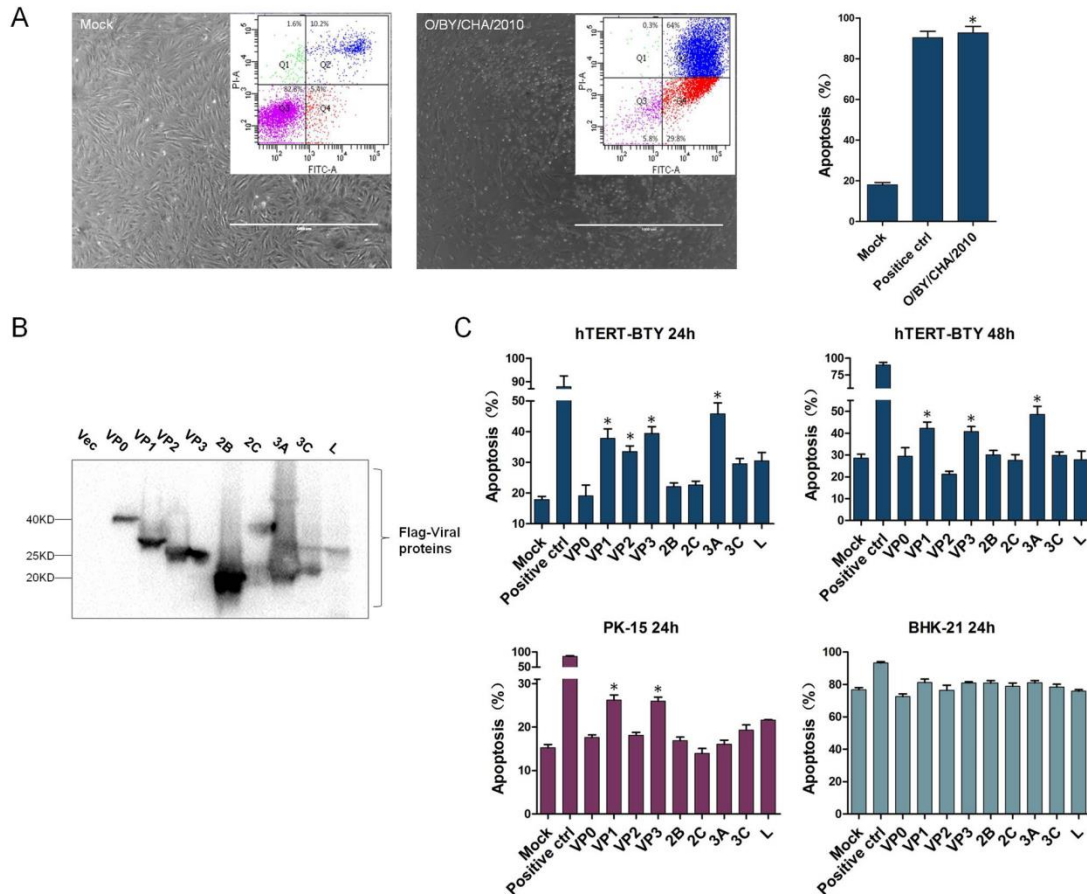

345

346 Figure 3. VP1, VP3 and 3A of type O FMDV are inducers of apoptosis. (A) hTERT-BTY cells  
 347 ( $5 \times 10^5$  cells/well) were infected or not with O/BY/CHA/2010 at an MOI of 0.05. At 24 h.p.i., the  
 348 samples were observed under a microscope, and apoptosis was detected by Annexin  
 349 V-FITC/PI staining and FCM. (B) hTERT-BTY cells ( $1 \times 10^6$  cells/well) were transfected with  
 350 FMDV proteins ( $5 \mu\text{g}/\text{well}$ ), respectively. At 48 h.p.t, the expression levels of  
 351 pCAGGS-FMDV-VP0, VP1, VP2, VP3, 2B, 2C, 3A, 3C and L were analyzed by Western blot.  
 352 (C) hTERT-BTY, PK-15 and BHK-21 cells ( $5 \times 10^5$  cells/well) were transfected with FMDV  
 353 proteins ( $3 \mu\text{g}/\text{well}$ ), respectively. At 24 and 48 h.p.t., respectively, apoptosis was detected by  
 354 Annexin V-FITC/PI staining and FCM, relative to the negative (empty vector, Mock) and  
 355 positive (Apoptosis Inducers Kit, Beyotime, China) controls. Experiments were performed in  
 356 triplicate and repeated three times with similar results. Data are mean  $\pm$  SD (n=3). Statistical  
 357 significance was analyzed by Student's t-test: \*P<0.05, \*\*P<0.01; h.p.i., hours post infection;  
 358 h.p.t., hours post transfection.

359 **The Gly129 of VP3 random coil is the key apoptotic and autophagic function site.**

360 To determine the apoptotic function domain or site of FMDV-VP3, a series of truncation  
361 mutants of Flag-FMDV-VP3 expressing plasmids were generated by PCR-based site-directed  
362 mutagenesis (Figure 4A). After successful expression of FMDV-VP3 mutants confirmed by  
363 Western blot, the above-mentioned plasmids were transfected into hTERT-BTY cells,  
364 respectively. The truncated mutants containing the region from carboxyl-terminal 95- to 155-  
365 amino acid induced comparable levels of apoptosis, while the other three mutants triggered  
366 significantly weaker apoptosis compared with FMDV-VP3 (Figure 4B). The apoptotic function  
367 domain in the carboxyl-terminal 106- to 143-amino acid region was subsequently analyzed.  
368 Deletion of the region from carboxyl-terminal 124- to 133-amino-acid reduced the apoptotic  
369 function of the FMDV-VP3 truncated mutant (VP3 Aa 124-330) compared with the complete  
370 VP3 protein (Figure 4C). Then, this region was further interrogated by alanine scanning  
371 site-directed mutagenesis. We found that Glycine 129 was essential for FMDV-VP3-induced  
372 apoptosis (Figure 4D). To validate its apoptotic function, we mutated this site to Ala in the  
373 complete FMDV-VP3 gene and constructed three mutant plasmids (Asia I -VP3 Gly129,  
374 A-VP3 Gly129 and O-VP3 Gly129). The results showed that the indicated mutation attenuated  
375 the apoptotic function of FMDV-VP3 proteins of type O, Asia I and A FMDV (Figure 4E).  
376 Coincidentally, the mutation of Gly129 to Ala remarkably reduced FMDV-VP3 induced LC3-II  
377 upregulation. The results indicate that the Gly129 also is a key site of FMDV-VP3 induced  
378 autophagy (Figure 4F).

379 The location of Gly129 at picornavirus VP3 was analyzed using SWISS-MODEL tool,  
380 PYMOL software and PDB data bank. We find that the Gly129 is located at a bend region of  
381 FMDV-VP3 random coil structure. The random coil is easily interacted with amino acids of the  
382 surrounding environment, the mutation of Gly129 may change such interaction. In FMDV  
383 caspid, for the reason that amino acids side chains get longer, the mutation of Gly129 to Ala  
384 has effect on the interaction between VP3 and adjacent VP2 and ultimately remarkable shrunk  
385 the volume of viral cavity (Figure 4G). Coincidentally, in the similar location of other  
386 picornaviruses, including CV, EV71, SVA and PV, the Gly is conserved (Figure 4H). Above  
387 results indicating that the ability of cell death induction may be conserved amongst



388 picornaviruses and this may depend on the specified structure.

389 In an attempt to investigate the effect of VP3 Gly129 on FMDV-induced apoptosis and its  
390 pathological relevance, two recombinant viruses with the apoptotic site of VP3 mutated to Ala  
391 or not, namely, rVP3-129/FMDV and rVP3/FMDV, were rescued, respectively. The resultant  
392 recombinant viruses were passaged and verified by viral genome sequencing.

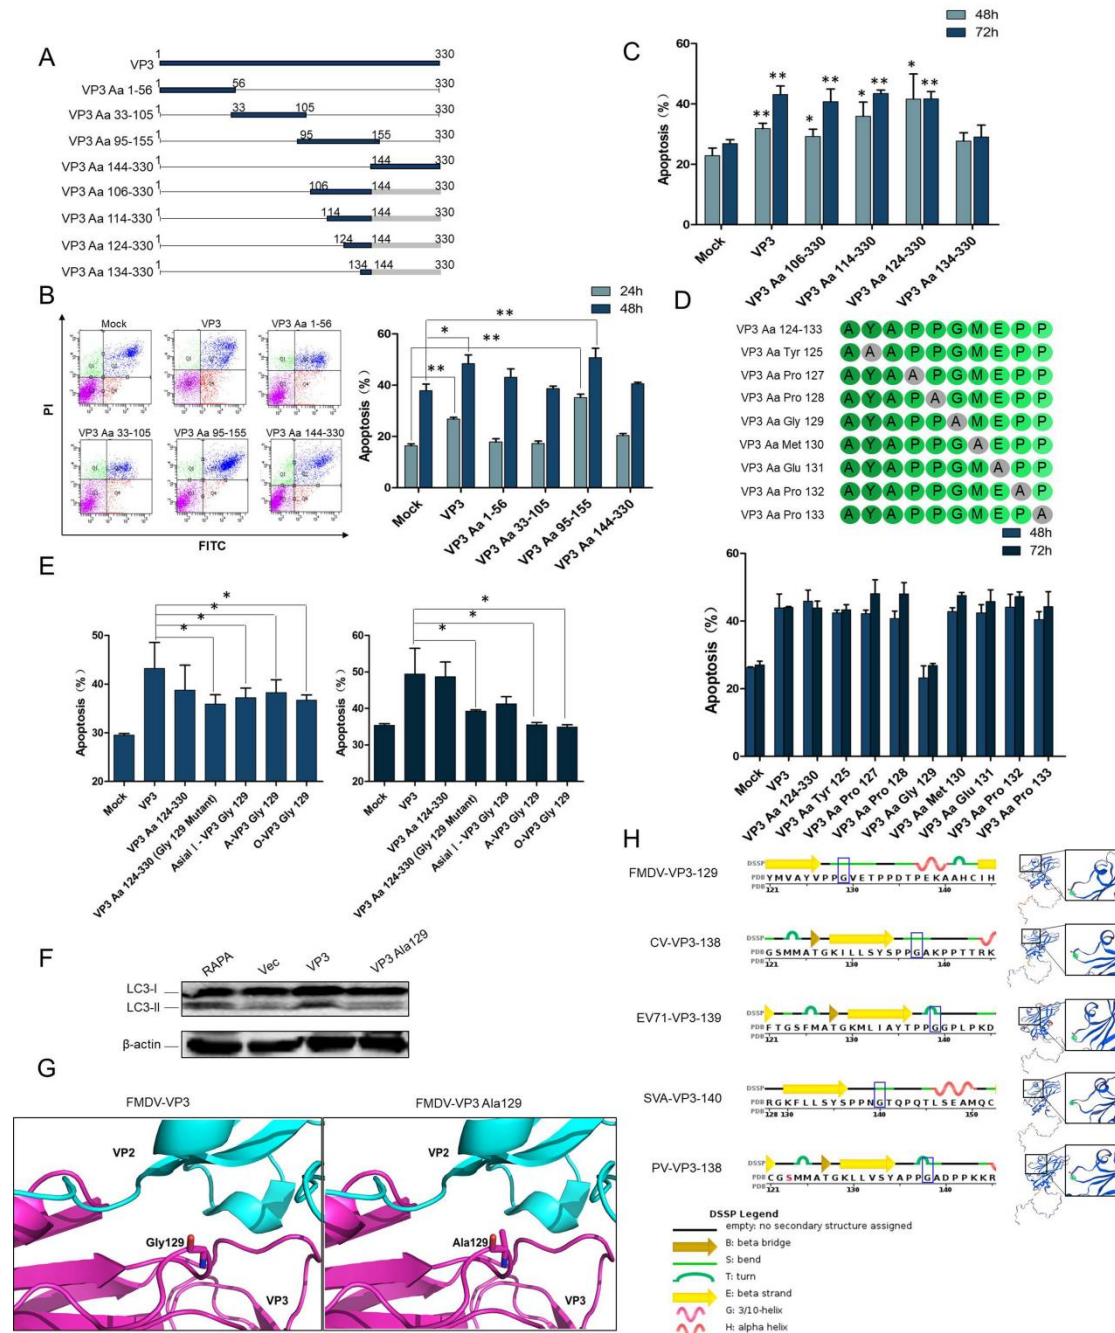

393

394 Figure 4. Identification of the apoptotic and autophagic function site of VP3. (A) Schematic  
 395 representations of a series of Flag-tagged truncated FMDV-VP3 constructs. (B) hTERT-BTY  
 396 cells ( $5 \times 10^5$  cells/well) were transfected with FMDV-VP3, indicated FMDV-VP3 mutants and  
 397 the empty vector, respectively ( $3 \mu\text{g/well}$ ). At 24 and 48 h.p.t., respectively, apoptosis was  
 398 detected by Annexin V-FITC/PI staining and FCM. (C) hTERT-BTY cells ( $5 \times 10^5$  cells/well)  
 399 were transfected with FMDV-VP3, indicated FMDV-VP3 mutants and the empty vector,

400 respectively (3 $\mu$ g/well). At 48 and 72 h.p.t., apoptosis was detected by Annexin V-FITC/PI  
401 staining and FCM. (D) hTERT-BTY cells (5 $\times$ 10<sup>5</sup> cells/well) were transfected with FMDV-VP3,  
402 indicated FMDV-VP3 mutants and empty vector, respectively (3 $\mu$ g/well). At 48 and 72 h.p.t.,  
403 respectively, apoptosis was detected by Annexin V-FITC/PI staining and FCM. (E)  
404 hTERT-BTY cells (5 $\times$ 10<sup>5</sup> cells/well) were transfected with FMDV-VP3, indicated FMDV-VP3  
405 mutants and the empty vector, respectively (3 $\mu$ g/well). At 48 and 72 h.p.t., respectively,  
406 apoptosis was detected by Annexin V-FITC/PI staining and FCM. (F) HEK-293T cells (10<sup>5</sup>  
407 cells/well) were transfected with empty vector, FMDV-VP3 or FMDV-VP3 Ala129. At 24 h.p.t.,  
408 positive control cells were treated with rapamycin (RAPA). The expression levels of caspase-3  
409 were detected by Western blot at 48 h.p.t.. (G) The influences on protein structure of  
410 FMDV-VP3 Gly129 mutated to Ala were analyzed by PYMOL software. (H) The location of Gly  
411 at FMDV-VP3 (PDB ID:4IV1), CV-VP3 (PDB ID:4Q4V), EV71-VP3 (PDB ID:4RR3), SVA-VP3  
412 (PDB ID:6ADS) and PV-VP3 (PDB ID:5KU0) was analyzed using SWISS-MODEL tool and  
413 PDB data bank. Experiments were performed in triplicate and repeated three times with similar  
414 results. Data are mean  $\pm$  SD (n=3). Statistical significance was analyzed by Student's  
415 t-test: \*P<0.05, \*\*P<0.01.

416 **VP3 interacts with p53 and regulates apoptotic and autophagic signaling in a p53**  
417 **dependent manner**

418 The apoptotic pathway is regulated by a massive and sophisticated network, by which viruses  
419 usually manipulate host apoptosis through key apoptotic molecules (40). How FMDV and  
420 FMDV-VP3 trigger the apoptotic pathway remains elusive. We firstly examined the contribution  
421 of many key apoptotic molecules such as caspases, Bcl-2 related proteins and p53 in FMDV  
422 induced apoptosis. The results indicated that caspase proteins, Bcl-2 and p53 mediated  
423 signaling pathway might contribute to FMDV induced apoptosis (Figure S2A, S2B). To  
424 investigate whether FMDV-VP3 functions by interacting with key apoptotic proteins which  
425 directly regulate the apoptotic signaling pathway, hTERT-BTY cells were transfected with the  
426 pCAGGS vector/Flag-VP3/Flag-VP3 Ala129. As shown in Figure S2C, endogenous p53 and  
427 XIAP were co-precipitated with Flag-FMDV-VP3. However, the Flag-FMDV-VP3 Ala129 failed

428 to interact with p53 and did not affect the interaction between FMDV-VP3 and XIAP. To  
429 confirm the interaction between FMDV-VP3 and p53, exogenous and semi-endogenous co-IP  
430 were performed. The results of exogenous co-IP showed that only HA-p53 was pulled down by  
431 Flag-FMDV-VP3, while no interactions with the Flag-FMDV-VP3 Ala129 and pCAGGS vector  
432 were found (Figure 5A). The results of semi-endogenous co-IP showed that under the IgGH  
433 band, a 53-KD band corresponding to p53 was evident, whereas no p53 was detected in the  
434 empty vector and IgG groups (Figure 5B). Together, these results provided strong evidence  
435 that FMDV-VP3 interacted specifically and directly with p53, and the apoptotic site Gly129 was  
436 essential for this interaction.

437 To further visualize the interaction between FMDV-VP3 and p53, immunofluorescence was  
438 carried out. As illustrated in Figure 5C, stabilized p53 accumulated in the nucleus in vector  
439 infected HEK293T cells, whereas upon expression of FMDV-VP3, p53 was translocated from  
440 the nucleus to the cytoplasm and co-localized with FMDV-VP3. The FMDV also co-localized  
441 with endogenous p53 in the cytoplasm (Figure 5D). In in vivo experiments, FMDV-VP3 was  
442 co-localized with endogenous p53 in the cytoplasm of rVP3/FMDV-challenged guinea pig  
443 tissues (Figure 5E). However, in most tissue cells of rVP3-129/FMDV-challenged guinea pigs,  
444 p53 mainly accumulated in the nucleus and to a lesser extent, co-localized with FMDV-VP3 in  
445 the cytoplasm. These results revealed that FMDV-VP3 contributes to p53 translocation from  
446 the nucleus into the cytoplasm, and Gly129 is essential for the co-localization of FMDV-VP3  
447 and p53. A similar phenomenon was observed in both cells and animals infected by the  
448 FMDV.

449 Then, a VP3-induced increase in p53 protein levels was detected in FMDV-VP3 but not  
450 empty vector transfected hTERT-BTY cells (Figure 5F). We next explored which  
451 post-translational modification types FMDV-VP3 employed to facilitate the activation and  
452 accumulation of p53. hTERT-BTY cells were transfected with FMDV-VP3 plasmids or the  
453 empty vector, and the results showed that FMDV-VP3 promoted p53 phosphorylation as  
454 transfection time increased. Furthermore, overexpression of p53 significantly enhanced  
455 FMDV-VP3-induced apoptosis in hTERT-BTY cells (Figure 5G), suggesting that p53 is crucial  
456 for VP3-induced apoptosis. Moreover, the apoptosis level of FMDV-VP3-transfected cells  
457 pre-treated with PFT- $\alpha$  was significantly lower than that of the DMSO group (Figure 5H). The

458 results indicated that p53 directly promoted FMDV-VP3-induced apoptosis. The effect of p53  
459 on FMDV-VP3-induced autophagy was also investigated. The results of Western blot indicated  
460 that the LC3-II upregulation induced by FMDV-VP3 was substantially declined with p53  
461 pathway inhibition (Figure 5I) while that was further enhanced by p53 overexpression (Figure  
462 5J). For other picornaviruses, containing PV and SVV, were proved to upregulated the  
463 expression of phosphorylated p53 (Figure 5K). All the data indicated that p53 is a crucial node  
464 in VP3-induced apoptosis and autophagy pathway, and the function may be conserved  
465 amongst picornaviruses.

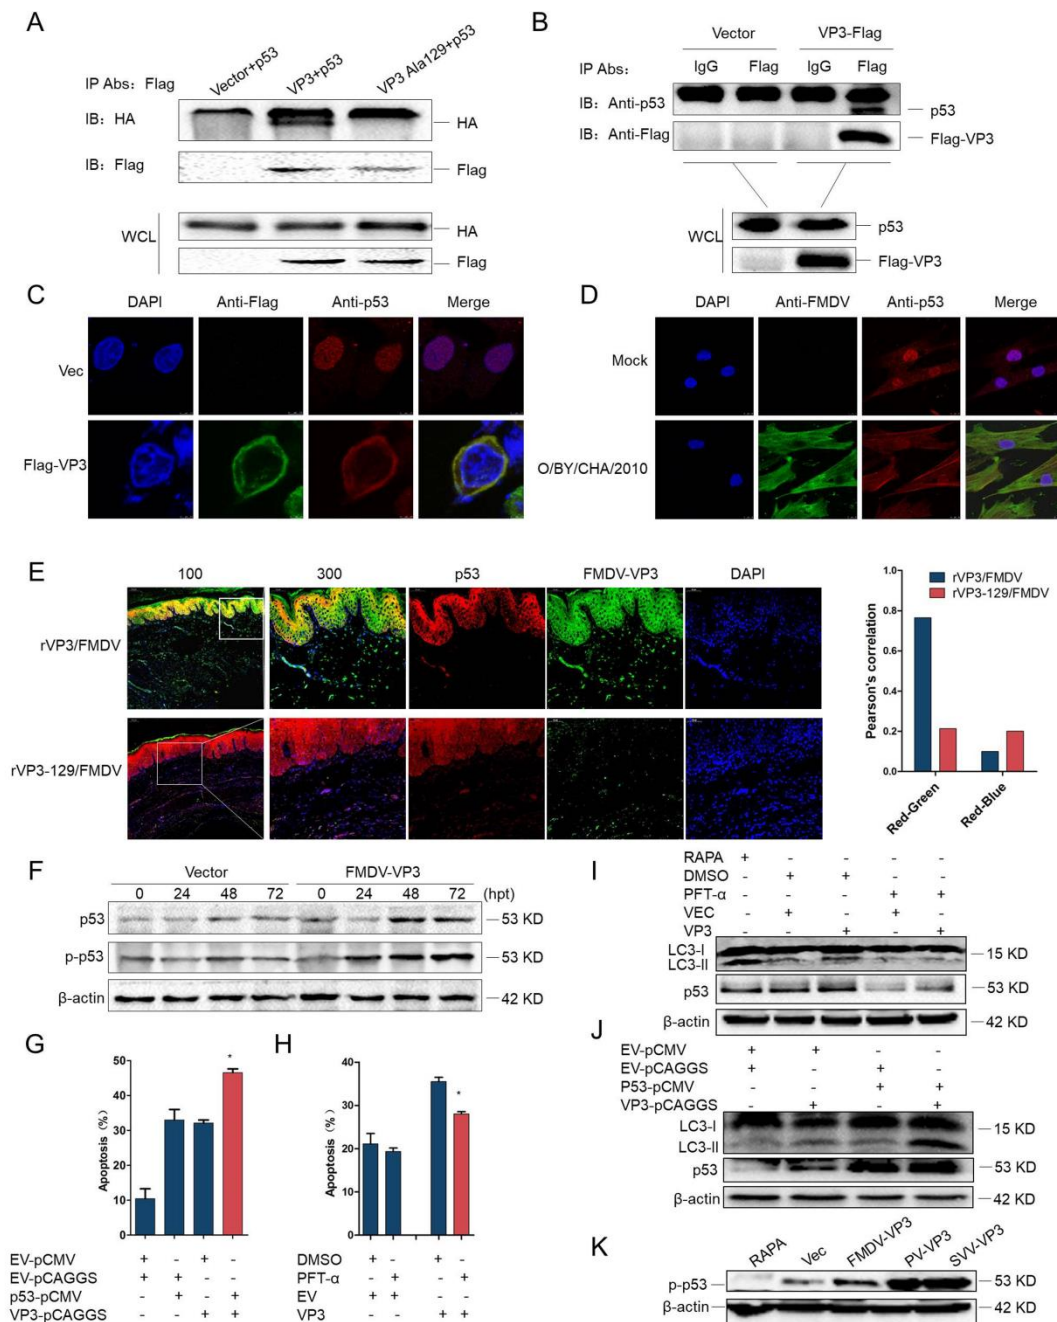

466

467 Figure 5. FMDV-VP3 interacts with p53. (A) HEK-293T cells ( $2 \times 10^6$  cells/well) were  
 468 co-transfected with 5 $\mu$ g HA-p53 and 5 $\mu$ g empty Flag vector/Flag-FMDV-VP3/Flag-  
 469 FMDV-VP3-Ala129 for 36 h. Co-immunoprecipitation was performed by using anti-Flag  
 470 antibody. Anti-p53 antibody was used to detect the precipitated proteins. (B) hTERT-BTY cells  
 471 ( $2 \times 10^6$  cells/well) were transfected with 10 $\mu$ g empty Flag vector or Flag-FMDV-VP3 for 48 h,  
 472 and cell lysates were immunoprecipitated with mouse anti-IgG or anti-Flag antibodies. (C)

22

473 HEK-293T cells ( $2 \times 10^5$  cells/well) were co-transfected with  $2 \mu\text{g}$  HA-p53 and  $2 \mu\text{g}$   
474 Flag-FMDV-VP3/empty Flag vector. At 48 h.p.t., co-localization of HA-p53 (red) and  
475 Flag-FMDV-VP3 (green) was observed by confocal microscopy. (D) hTERT-BTY cells ( $2 \times 10^5$   
476 cells/well) were infected or not with O/BY/CHA/2010 at an MOI of 0.01. At 24 h.p.i.,  
477 co-localization of p53 (red) and FMDV (green) was observed by confocal microscopy. (E)  
478 Guinea pigs were challenged with a high (dilution multiple is 0) dose of the two recovered  
479 viruses ( $200 \mu\text{L}/\text{animal}$ ). At 7 d.p.c., sections of pathologic tissues were incubated with the  
480 indicated antibodies and observed by confocal microscopy. DAPI, blue; FMDV-VP3, green;  
481 p53, red. Pearson's correlation analysis of p53 and FMDV-VP3 or stained nucleus was  
482 performed with Image pro plus 6.0. (F) hTERT-BTY cells ( $5 \times 10^5$  cells/well) were transfected  
483 with  $3 \mu\text{g}$  empty Flag vector or Flag-FMDV-VP3. At 0, 24, 48 and 72 h.p.t., respectively, the  
484 expression levels of p53 and p-p53 were detected by Western blot. (G) hTERT-BTY cells  
485 ( $5 \times 10^5$  cells/well) were transfected with  $2 \mu\text{g}$  empty HA vector or HA-p53. At 24 h.p.t., the cells  
486 were transfected with  $2 \mu\text{g}$  empty Flag vector or Flag-FMDV-VP3 for 48 h. Apoptosis was  
487 detected by Annexin V-FITC/PI staining and FCM. (H) hTERT-BTY cells ( $5 \times 10^5$  cells/well)  
488 were pretreated with PFT- $\alpha$  ( $10 \mu\text{M}$ ) or DMSO for 24 h, and transfected with  $2 \mu\text{g}$  empty Flag  
489 vector or Flag-FMDV-VP3 for 48 h. Apoptosis was detected by Annexin V-FITC/PI staining  
490 and FCM. (I) HEK-293T cells ( $2 \times 10^5$  cells/well) were pretreated with PFT- $\alpha$  ( $10 \mu\text{M}$ ) or DMSO  
491 for 24 h, and transfected with  $2 \mu\text{g}$  empty Flag vector or Flag-FMDV-VP3 for 48 h, positive  
492 control cells were treated with rapamycin (RAPA) for 24h. The expression levels of LC3-I/II  
493 and p53 were detected by Western blot at 48 h.p.t.. (J) HEK-293T cells ( $2 \times 10^5$  cells/well) were  
494 transfected with  $2 \mu\text{g}$  empty HA vector or HA-p53. At 24 h.p.t., the cells were transfected with  
495  $2 \mu\text{g}$  empty Flag vector or Flag-FMDV-VP3 for 24 h. The expression levels of LC3-I/II and p53  
496 were detected by Western blot. (K) HEK-293T cells ( $10^5$  cells/well) were transfected with  
497 empty vector or FMDV-, PV- and SVA-VP3. At 48 h.p.t., the expression levels of p-p53 were  
498 detected by Western blot. Except for animal experiments, all assays were performed in  
499 triplicate and repeated three times with similar results. Data are mean  $\pm$  SD (n=3). Statistical  
500 significance was analyzed by Student's t-test: \*P<0.05, \*\*P<0.01. EV, Empty Vector.

501 **FMDV-VP3 promotes p53 interaction with the pro-apoptotic protein Bad, and triggers**  
502 **the mitochondrial apoptotic pathway**

503 Previous studies suggested that p53 translocates from the nucleus into to cytoplasm (41).  
504 Under many pro-apoptotic conditions, p53 is transferred to the mitochondria and directly  
505 interacts with critical Bcl-2 related proteins such as Bax, Bak, Bcl-XL, Bcl-2 and Bad (42, 43).  
506 To assess the downstream events following the interaction between FMDV-VP3 with p53, a  
507 series of co-immunoprecipitation experiments were performed to screen for downstream  
508 proteins. hTERT-BTY cells were co-transfected with the Flag-FMDV-VP3-expressing plasmid  
509 or p53-HA/pCMV vector. The results showed that only Bad was pulled down by p53-HA, but  
510 not with the pCMV-HA vector (Figure 6A).

511 To assess whether VP3 expression is essential for the interaction between p53 and Bad,  
512 hTERT-BTY cells were transfected with Flag-FMDV-VP3 or the vector. As shown in Figure 6B,  
513 p53 was pulled down by Bad in the presence of FMDV-VP3; nevertheless, there was no  
514 interaction between p53 and Bad in the vector-transfection group. Moreover, to examine  
515 whether VP3 enables Bad to co-localize with p53 in the mitochondria, the  
516 Flag-FMDV-VP3-expressing plasmid or vector was transfected into HEK293T cells. Bad is  
517 normally scattered in the cytoplasm, whereas p53 is localized in the nucleus. However, upon  
518 expression of FMDV-VP3, p53 was translocated from the nucleus to the cytoplasm, and  
519 co-localization of p53 and Bad in the mitochondria was observed (Figure 6C). In in vivo  
520 experiments, footpad lesions were used to map the distribution of p53 and Bad. Double  
521 immunofluorescent staining showed that both endogenous p53 and Bad co-localized in the  
522 cytoplasm after challenge with rVP3/FMDV. In contrast, Bad in tissue cells of  
523 rVP3-129/FMDV-challenged animals displayed diffused distribution, and co-localization with  
524 p53 was merely detected (Figure 6D).

525 The anti-apoptotic protein Bcl-2 and pro-apoptotic proteins Bad and Bax are key molecules  
526 responsible for the intrinsic mitochondria apoptotic pathway. Experiments were performed to  
527 determine the importance of Bad, Bcl-2 and Bax in FMDV-VP3-induced apoptosis. The  
528 expression levels of Bad and its downstream protein Bax were increased, while Bcl-2 amounts  
529 were decreased by FMDV-VP3 transfection (Figure 6E). Next, we found that FMDV-VP3



530 notably increased apoptotic rates in Bad and Bax overexpressing cells. However, there was no  
531 change of FMDV-VP3-induced apoptosis in cells overexpressing another Bcl-2 related protein,  
532 Bid (Figure 6F). Then, the effect of Bcl-2 pathway inhibition on FMDV-VP3-induced apoptosis  
533 was investigated. The results indicated that apoptosis induced by FMDV-VP3 was  
534 substantially increased in cells with inhibited Bcl-2 pathway (Figure 6G). Collectively, these  
535 results indicated that FMDV-VP3 induces apoptosis via the mitochondrial pathway mediated  
536 by Bad, Bax and Bcl-2.

537 The downstream components of the complex comprising p53 and Bad in the  
538 FMDV-VP3-dependent apoptosis pathway were then determined. The results revealed that  
539 the levels of Fas, Akt and cleaved caspases -3, 8 and 9 were significantly increased by  
540 FMDV-VP3 rather than the empty vector, as well as cytoplasmic cyto-c amounts, whereas  
541 mitochondrial cyto-c levels were notably reduced (Figure S3A). Since many key proteins of the  
542 intrinsic and extrinsic apoptotic pathways were regulated by FMDV-VP3, to examine which of  
543 the aforementioned proteins are downstream components of p53 in the FMDV-VP3-dependent  
544 apoptosis pathway, hTERT-BTY cells were pre-treated with the p53 specific inhibitor PFT- $\alpha$  for  
545 24 h and transfected with FMDV-VP3 or empty vector. Compared with cells untreated with  
546 PFT- $\alpha$ , FMDV-VP3-induced upregulation or downregulation of Bad, Bax, Bcl-2, cytoplasmic  
547 cyto-c and cleaved caspase-3 was significantly suppressed in the PFT- $\alpha$  pretreatment group,  
548 but p53 inhibition had no effect on FMDV-VP3-induced upregulation of Akt (Figure S3B). This  
549 implies that Bad, Bax, Bcl-2, cytoplasmic cyto-c and caspase-3 are downstream molecules of  
550 p53 in the FMDV-VP3-dependent apoptosis pathway, where FMDV-VP3 might activate  
551 another apoptotic pathway mediated by Akt.

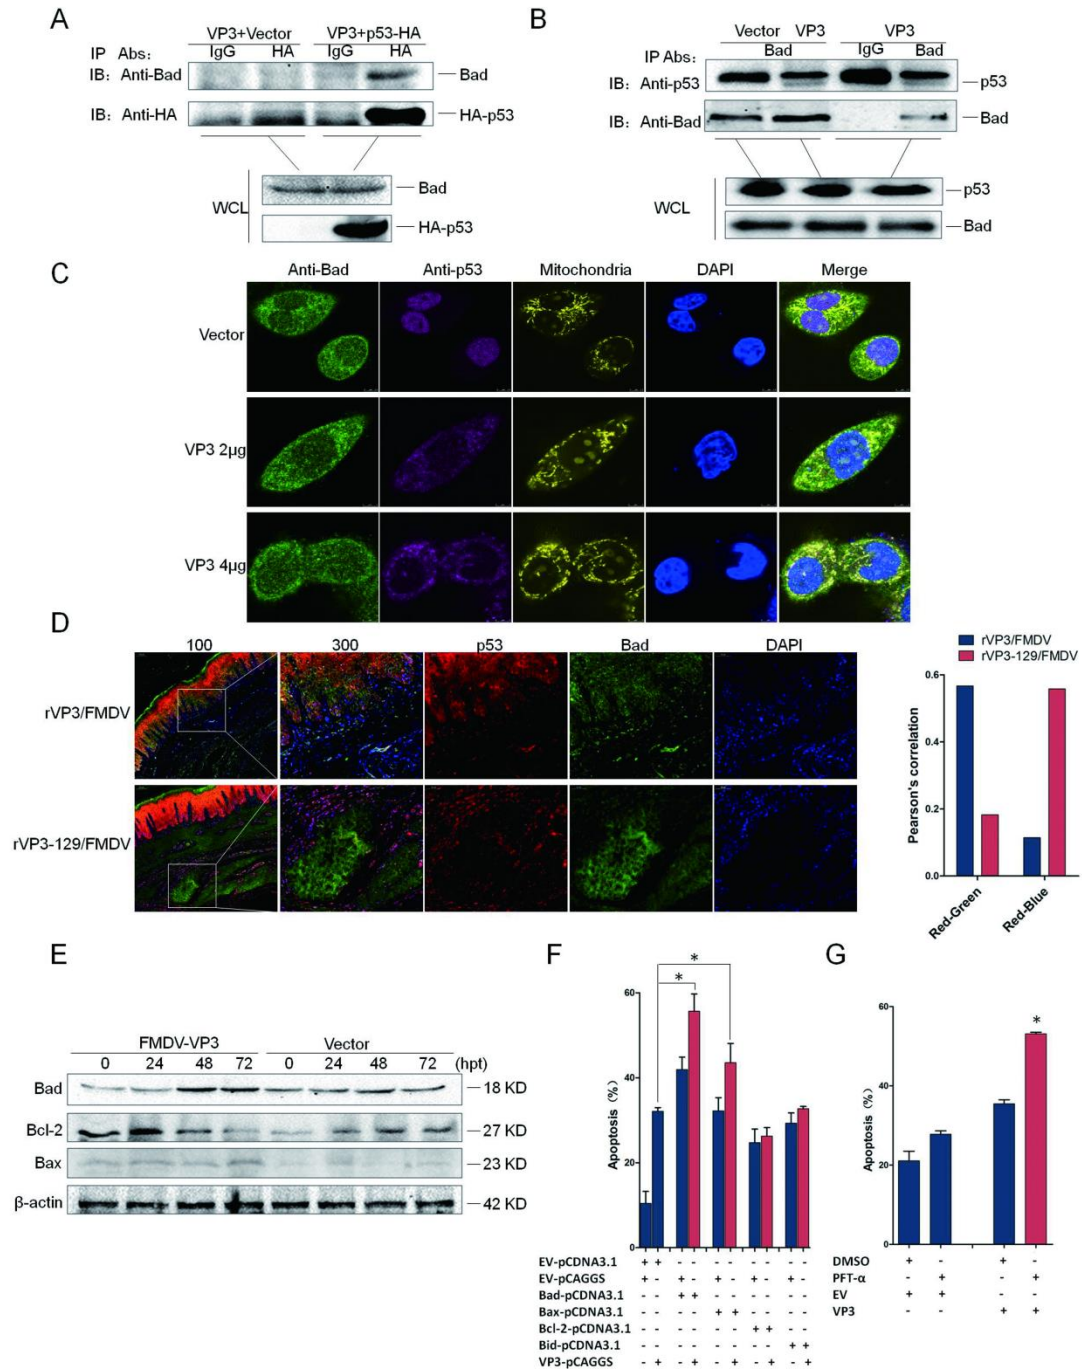

552

553 Figure 6. p53 interacts with Bad in the presence of FMDV-VP3. (A) hTERT-BTY cells ( $2 \times 10^6$   
554 cells/well) were co-transfected with Flag-FMDV-VP3 (5μg) and HA-p53/empty HA vector (5μg)  
555 for 48 h. The lysates were immunoprecipitated with mouse anti-IgG or anti-HA antibody. The  
556 eluted fractions were detected with anti-Bad antibody. (B) hTERT-BTY cells ( $2 \times 10^6$  cells/well)  
557 were transfected with empty Flag vector or Flag-FMDV-VP3 (10μg). At 24 h.p.t., cell lysates

558 were immunoprecipitated with anti-Bad or anti-IgG antibody. The precipitated proteins were  
559 blotted with anti-p53 antibody. (C) HEK-293T cells ( $10^5$  cells/well) were transfected with empty  
560 Flag vector or increasing quantities of Flag-FMDV-VP3 (2 $\mu$ g or 4 $\mu$ g). At 24 h.p.t., cell  
561 mitochondria were labeled with the mitochondrial probe (500 nM) for 40 min. Then, cells were  
562 fixed and incubated with anti-endogenous p53 and Bad antibodies, respectively.  
563 Co-localization of p53 (purple), Bad (green) and the mitochondria (orange) was observed by  
564 confocal microscopy. (D) Guinea pigs were challenged with a high (dilution multiple is 0) dose  
565 of the two recovered viruses (200 $\mu$ L/animal). At 7 d.p.c., the lesions were incubated with the  
566 indicated antibodies and examined by confocal microscopy. DAPI, blue; Bad, green; p53, red.  
567 Pearson's correlation analysis of p53 and Bad or stained nucleus was analyzed with Image pro  
568 plus 6.0. (E) hTERT-BTY cells ( $5 \times 10^5$  cells/well) were transfected with 3 $\mu$ g empty Flag vector  
569 or Flag-FMDV-VP3. At 0, 24, 48 and 72 h.p.t., respectively, the expression levels of Bad, Bcl-2  
570 and Bax were detected by Western blot. (F) hTERT-BTY cells ( $5 \times 10^5$  cells/well) were  
571 transfected with 2 $\mu$ g empty vector and Bad, Bax, Bcl-2, and Bid-expressing plasmids,  
572 respectively. At 24 h.p.t., the cells were transfected with 2 $\mu$ g empty Flag vector or  
573 Flag-FMDV-VP3 for 48 h. Apoptosis was detected by Annexin V-FITC/PI staining and FCM. (G)  
574 hTERT-BTY cells ( $5 \times 10^5$  cells/well) were pretreated or not with TW-37 (10 $\mu$ M) for 24 h, and  
575 transfected with 2 $\mu$ g empty Flag vector or Flag-FMDV-VP3 for 48 h. Apoptosis was detected  
576 as above. Except for animal experiments, assays were performed in triplicate and repeated  
577 three times with similar results. Data are mean  $\pm$  SD (n=3). Statistical significance was  
578 analyzed by Student's t-test: \*P<0.05, \*\*P<0.01.

579 **Gly129 of VP3 is essential for VP3-induced apoptosis and autophagy that enhance**  
580 **FMDV pathogenicity**

581 To determine the effect of the VP3 Gly129 residue on FMDV internalization, the two  
582 recombinant viruses were incubated with hTERT-BTY and PK-15 cells for 1 h. Unabsorbed  
583 and surface-bound viruses were removed, and rRT-PCR was used to quantitate the  
584 internalized FMDV. The results showed no significant influence on viral internalization in both  
585 hTERT-BTY and PK-15 cells with VP3 Gly129 mutated into Ala (Figure 7A). On the premise of

586 similar internalization, hTERT-BTY cells were infected with the aforementioned viruses to  
587 analyze the impact of the VP3 Gly129 residue on FMDV-induced cellular apoptosis. Our data  
588 showed that the apoptosis rate of rVP3-129/FMDV infected cells was drastically lower than  
589 that of the rVP3/FMDV infected group (Figure 7B). This was further corroborated by TUNEL  
590 assays on major pathologically-changed tissues, in which the percentages of TUNEL positive  
591 cells in both high (0) and low (-5) dose groups challenged by rVP3-129/FMDV were lower than  
592 those of the corresponding dose groups challenged by rVP3/FMDV (Figure 7C). Consistently,  
593 results of immunofluorescent staining on footpad lesions showed that the positive cells  
594 percentage and mean fluorescence intensity of FMDV, p53, cleaved-caspase3 and LC3-I/II  
595 are remarkably higher in rVP3/FMDV challenged groups than the corresponding dose groups  
596 challenged by rVP3-129/FMDV. It is important to emphasize that the statistical gap is  
597 particularly noticeable in middle and later stage (15 d.p.c.) of FMDV infection (Figure 7D). The  
598 mutation of Gly129 to Alu remarkably reduced rVP3/FMDV induced LC3-II upregulation was  
599 further corroborated by Western blot (Figure 7E). Taken together, the decreased ability to  
600 induce apoptosis and autophagy by FMDV in vivo was directly attributable to the mutation of  
601 the VP3 Gly129.

602 We next performed plaque assays in BHK-21, IBRS-2 and PK-15 cells. The results indicated  
603 that the mutation of the apoptotic site substantially reduced FMDV titers (PFU/mL) in all tested  
604 cell lines (Figure 7F).

605 In in vivo experiments, clinical signs of challenged guinea pigs were observed daily. The  
606 clinical scores of the -1, -3, -5 and -7 challenge groups administered rVP3-129/FMDV were  
607 significantly lower than those of the corresponding rVP3/FMDV groups (Figure 7G), indicating  
608 that VP3 Gly129 mutation directly reduces the virulence and pathogenicity of the FMDV.

609 FMDV-specific antibody titers were measured. There was no significant difference in  
610 antibody levels between comparable dose challenge groups, with the exception of the -1 group,  
611 where the IgG levels of the rVP3-129/FMDV-challenge group were noticeably higher than  
612 those of rVP3/FMDV-challenged guinea pigs (Figure 7H).

613 To assess the histopathology of animals challenged with the two FMDV strains, H&E  
614 staining of major tissues was performed. In the rVP3/FMDV 0-challenge group (Figure 7I),  
615 pathological changes occurred in almost all major organs of guinea pigs, e.g. extensive

616 necrosis, degeneration, and inflammatory cell infiltration. On the contrary, the extent of tissue  
 617 damage was markedly reduced in rVP3-129/FMDV 0-challenged guinea pigs, where the heart  
 618 tissues appeared normal. Minor pathological changes were observed in the liver, lung, kidney,  
 619 mesenteric lymph nodes (MLN) and claw lesions. Likewise, the extent of tissue damage of low  
 620 dose rVP3-129/FMDV-5-challenged guinea pigs was also significantly reduced compared with  
 621 that of the rVP3/FMDV -5-challenge group. Taken together, these results indicated that the  
 622 mutation of the VP3 apoptotic site could be an important determinant of reduced FMDV  
 623 pathogenicity.

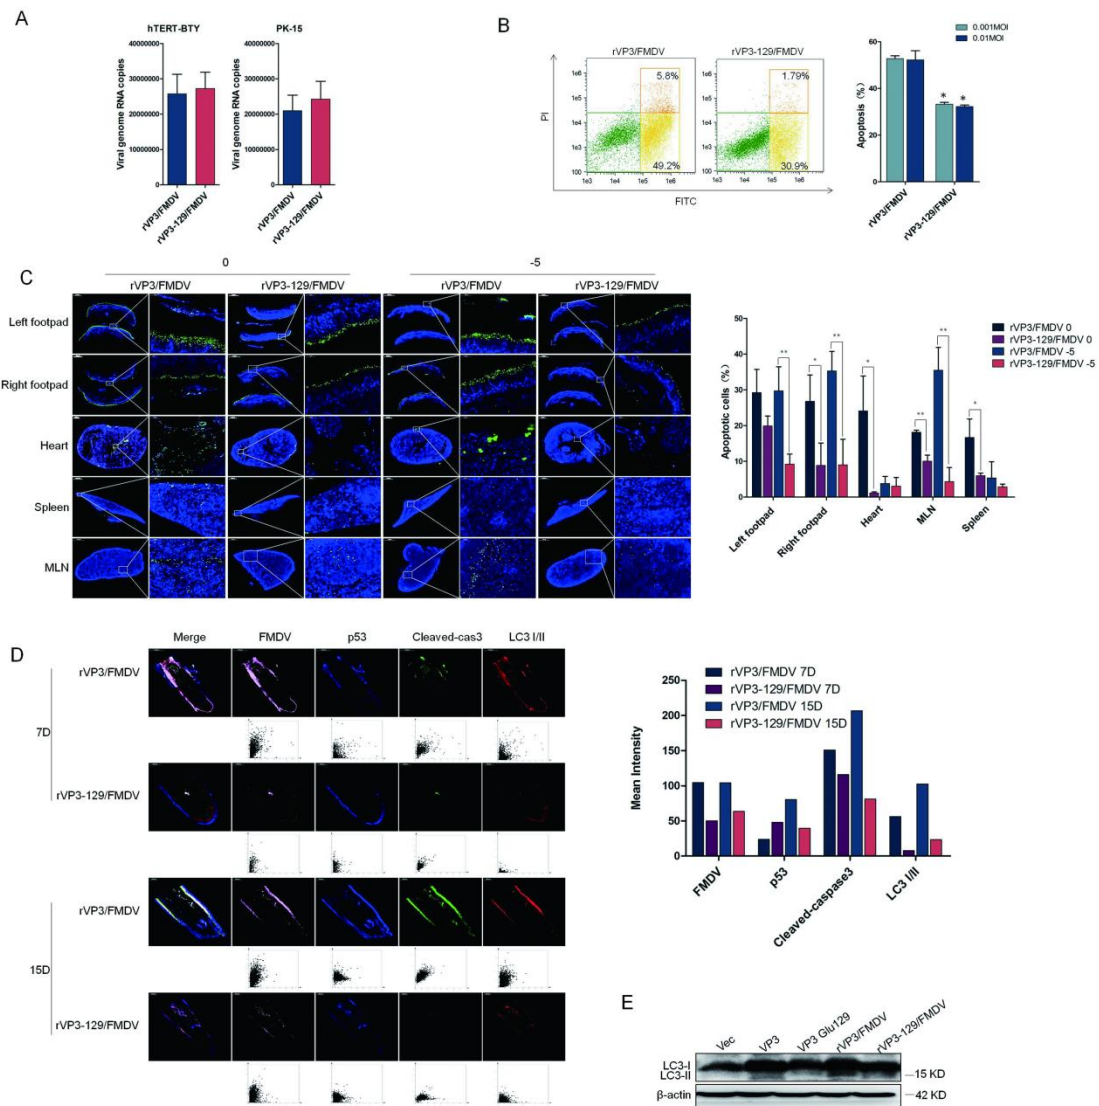

624

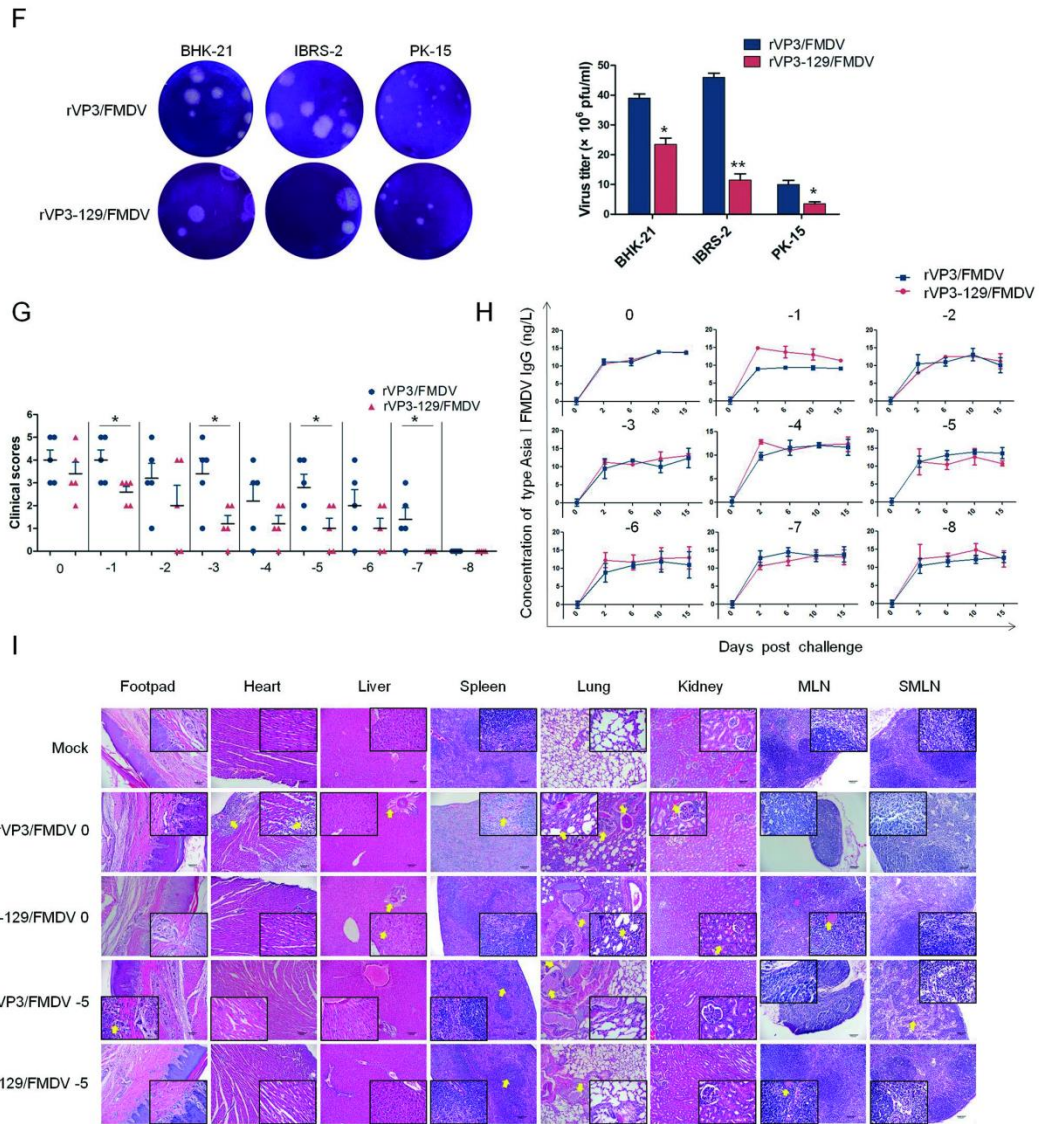

625

626 Figure 7. The apoptotic site of VP3 is essential for FMDV apoptotic and autophagic function,

627 titer and pathogenicity. (A) hTERT-BTY and PK-15 cells ( $5 \times 10^5$  cells/well) were infected with

628 the two rescued viruses at a dose of  $1 \times 10^8$  viral genomic RNA copies for 1 h at  $37^\circ\text{C}$ , and

629 unabsorbed viruses were washed with ice-cold Hanks solution three times. To remove the

630 surface-bound viruses, the cells were digested with trypsin-EDTA (GIBCO) for 5 min. Then,

631 the cells were washed three times with Hanks balanced salt solution and rRT-PCR was used

632 to quantitate the internalized FMDV. (B) hTERT-BTY cells ( $5 \times 10^5$  cells/well) were infected

633 with the two rescued viruses at an MOI of 0.001 or 0.01, at 24 h.p.i., and apoptosis was

634 detected by Annexin V-FITC/PI staining and FCM. (C) Guinea pigs were challenged with high

635 (dilution multiple is 0) and low (dilution multiple is  $10^5$ ) doses of the two recovered viruses

636 ( $200\mu\text{L}/\text{guinea pig}$ ), respectively, and apoptotic rates of major pathologically-changed tissues,

637 including the left and right footpads, heart, spleen and MLN, at 7 d.p.c. were analyzed by the  
638 TUNEL assay. The percentage of apoptotic cells was analyzed with Image pro plus 6.0. (D)  
639 Guinea pigs were challenged with high (dilution multiple is 0) doses of the two recovered  
640 viruses (200 $\mu$ L/guinea pig), respectively, At 7 and 15 d.p.c., the footpad lesions were  
641 incubated with the indicated antibodies and examined by confocal microscopy. FMDV, pink;  
642 p53, blue; cleaved-caspase3, green; LC3-I/II, red. The positive cells were analyzed  
643 respectively by HISTOQUEST software. (E) HEK-293T cells ( $10^5$  cells/well) were transfected  
644 with empty vector, FMDV-VP3, FMDV-VP3 Ala129 or infected with the two recovered viruses  
645 at an MOI of 0.01. The expression levels of LC3-I/II were detected by Western blot at 48 h.p.t.  
646 or 36 h.p.i.. (F) Cell monolayers were infected with the two rescued viruses at 37 $^{\circ}$ C for 1 h,  
647 and 0.6% gum Tragacanth overlay was added. After 48 h.p.i., the cells were stained with  
648 crystal violet. Plaques were captured, and PFUs were counted. (G) Guinea pigs were  
649 challenged with the indicated doses of the two recovered viruses (200 $\mu$ L/guinea pig). Clinical  
650 symptoms were scored using the double-blind method at 3 d.p.c. (H) FMDV-specific antibody  
651 titers of the challenged guinea pigs at 0, 3, 6, 10 and 15 d.p.c. were measured with a guinea  
652 pig FMDV IgG ELISA kit. (I) Guinea pigs were challenged with high (dilution multiple is 0) and  
653 low (dilution multiple is 105) doses of the two recovered viruses (200 $\mu$ L/guinea pig); the Mock  
654 group was injected with PBS. Histology of the heart, liver, spleen, lung, kidney, MLN,  
655 submaxillary lymph nodes (SMLN) and pathological tissues of the footpads at 7 d.p.c. were  
656 analyzed by H&E staining (100 $\times$ , 400 $\times$ magnification). Except for animal experiments, assays  
657 were performed in triplicate and repeated three times with similar results. Data are mean  $\pm$  SD  
658 (n=3). Statistical significance was analyzed by Student's t-test: \*P<0.05, \*\*P<0.01; d.p.c., days  
659 post challenge.

660 **VP3-induced apoptosis occurs at the middle and late stages of infection, and promotes**  
661 **FMDV replication**

662 Apoptosis induced by viruses may either stimulate or inhibit viral replication (44). Viral growth  
663 curves in FMDV permissive animal cell lines such as hTERT-BTY and PK-15 cells were  
664 generated to compare the propagation capacities of the two recombinant viruses. As shown in

665 Figure 8A, rVP3-129/FMDV exhibited a diminished ability to replicate in hTERT-BTY and  
666 PK-15 cells compared with rVP3/FMDV, suggesting that VP3 Gly129 is directly related to viral  
667 proliferation capacity.

668 FMDV replication levels in blood were also assessed. The viremia levels of groups  
669 challenged by the two rescued viruses increased over time and peaked at 6 days post  
670 challenge (d.p.c.). Compared with rVP3/FMDV-challenged guinea pigs, the  
671 rVP3-129/FMDV-challenge group showed significantly lower viremia levels (Figure 8B). In  
672 addition, FMDV amounts in footpad lesions in both challenge groups were analyzed by IHC.  
673 The data indicated that the viral load in rVP3-129/FMDV-challenged guinea pigs was  
674 substantially lower than in rVP3/FMDV-challenged animals (Figure 8C).

675 Next, we assessed the rates of apoptosis over time in lesion sites of guinea pigs challenged  
676 by the two FMDV strains. There was no significant difference in apoptotic rate between the two  
677 groups at the early stage (3 d.p.c.). In contrast, at the mid and late stages (7-15 d.p.c.),  
678 apoptotic rates of rVP3-129/FMDV- challenge groups were substantially lower than those of  
679 rVP3/FMDV- challenged animals (Figure 8D).



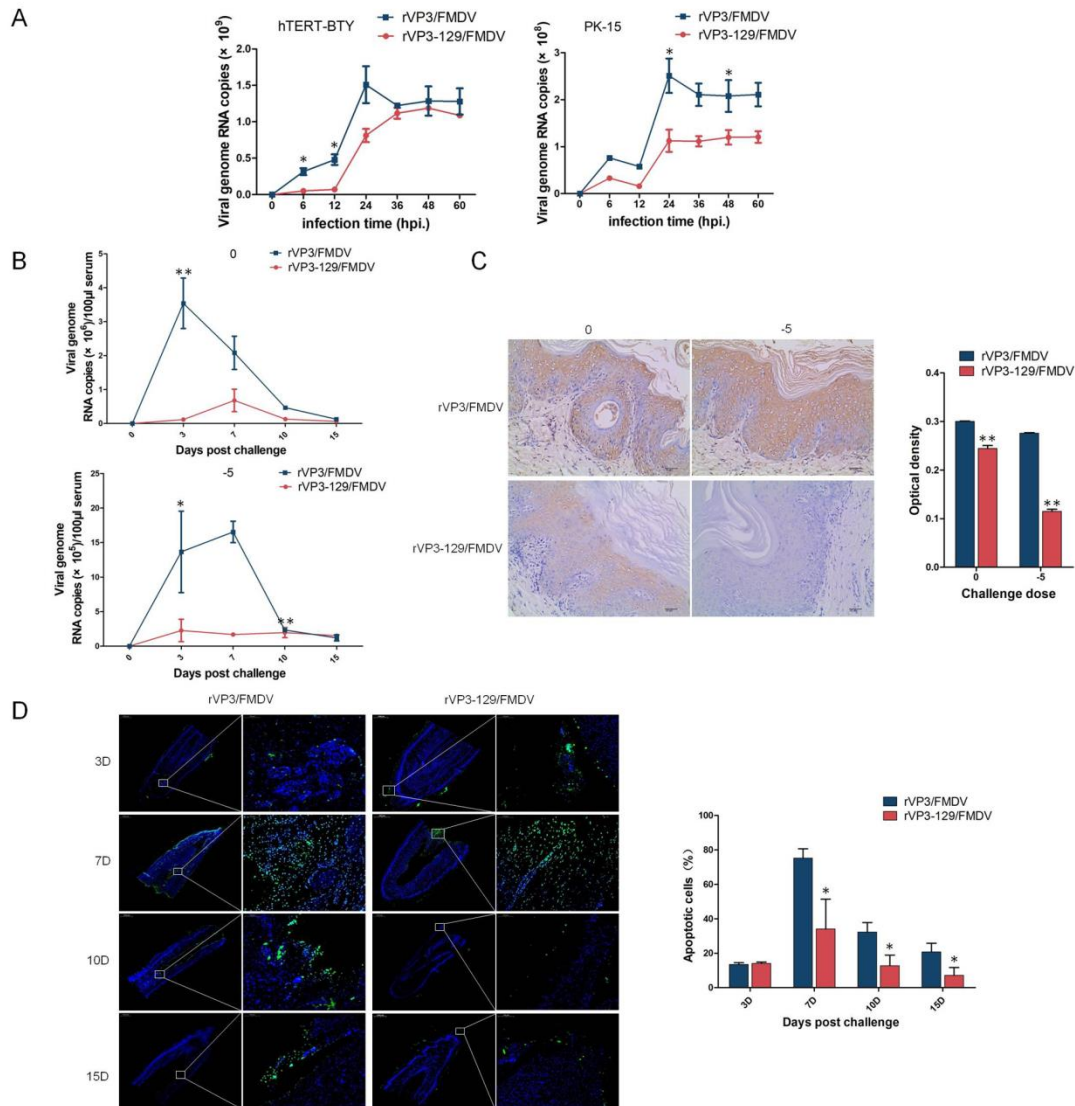

680

681 Figure 8. Apoptosis and autophagy induced by VP3 play a critical role in FMDV spread and  
 682 replication. (A) hTERT-BTY and PK-15 cells ( $5 \times 10^5$  cells/well) were infected with the two  
 683 rescued viruses at a dose of  $1 \times 10^6$  viral genomic RNA copies for 1 h, and unabsorbed viruses  
 684 were washed. Cells and supernatants were harvested at 0, 6, 12, 24, 36, 48 and 60 h.p.i.,  
 685 respectively, and viral RNA amounts were determined by RT-PCR. Experiments were  
 686 performed in triplicate and repeated three times with similar results. Data are mean  $\pm$  SD ( $n=3$ ).  
 687 (B) Guinea pigs were challenged with high (dilution multiple is 0) and low (dilution multiple is  
 688 105) doses of the two recovered viruses (200 $\mu$ L/guinea pig). Viral RNA copies in serum were  
 689 detected by RT-PCR. (C) Guinea pigs were challenged with high (dilution multiple is 0) and  
 690 low (dilution multiple is 105) doses of the two recovered viruses (200 $\mu$ L/guinea pig). FMDV of  
 691 pathogenic claw tissues were determined by IHC at 7 d.p.c. Statistical analysis of FMDV  
 692 amounts was performed based on IHC staining results in 3 randomly fields per section. (D)

693 Guinea pigs were challenged with the two recovered viruses (dilution multiple is  $10^4$ ), and  
694 apoptotic rates of footpad lesions at 3, 7, 10 and 15 d.p.c., respectively, were analyzed by the  
695 TUNEL assay. Statistical significance was analyzed by Student's t-test: \* $P < 0.05$ , \*\* $P < 0.01$ .

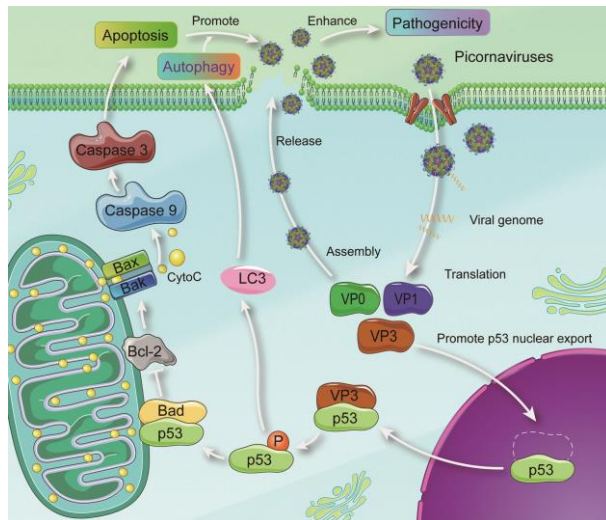

696

697 Figure 9. Hypothetical schematic model of the mechanism of VP3-induced cell death. As a  
698 stress signal, picornaviruses infection promotes p53 translocation from the nucleus into the  
699 cytoplasm and interacts with VP3. Activated p53 subsequently translocates to the  
700 mitochondria and interacts with Bad, which triggers the Bcl-2 family dependent intrinsic  
701 apoptotic signaling pathway. Meanwhile, activated p53 triggers the LC3 dependent autophagy.  
702 Finally, apoptosis and autophagy facilitate viral replication and enhance pathogenicity.

## 703 DISCUSSION

704 Most viruses have the capability to modulate apoptosis and autophagy in the host for their  
705 replication and dissemination (45, 46). Picornaviruses caused a variety of severe diseases in  
706 humans and livestock. To promote replication, the viral proteases 2A, 3C and 3CD of  
707 picornaviruses cleave proapoptotic proteins or nucleoporins to modulate apoptosis; meanwhile,  
708 2B protein alters intracellular ion signaling and controls apoptosis (47-49). Viral infection also  
709 is tightly related to autophagy. Poliovirus proteins 2BC increases LC3 lipidation and 3A inhibits  
710 autophagosome movement along microtubules (25, 50). CVB induces autophagy to promote

711 its replication (51). FMDV protein VP2 induces autophagy to enhance replication (31).  
712 However, whether other picornaviruses proteins regulate cell death and the association of cell  
713 death with viral pathogenicity remains unclear. In the present study, to explore novel cell death  
714 regulation proteins of picornaviruses, bioinformatics prediction approaches were performed.  
715 The functions of proteins to regulate cell death are often related to its hydrophobic regions.  
716 BH3-only proteins interact with BAK at the canonical hydrophobic groove (52). Bcl-xL interacts  
717 with other apoptosis regulation proteins through a large, primarily hydrophobic binding groove.  
718 Phosphorylation of the hydrophobic motif ser 662 is an essential step in the activation of the  
719 cell survival and death regulation protein protein kinase C delta (PKCd) (53). The  
720 transmembrane hydrophobic sequences of CVB non-structure protein 2B is essential for the  
721 induction of autophagy (54). In view of this, we firstly predict the hydrophobic property of  
722 FMDV, PV and SVA proteins. VP3 proteins of the three virus were selected as the main focus  
723 because which not only have high hydrophobicity score, but also have more amino acids with  
724 the top score. The VP3 of FMDV, PV and SVA has similar structure and they can induce both  
725 apoptosis and autophagy by verification.

726 FMDV was chosen as a model to understand further molecular mechanism of VP3 induced  
727 cell death. FMDV is cytotoxic in vivo and in vitro (55), but the main type of FMDV-induced cell  
728 death is still unclear. Here we found that FMDV can induce both apoptosis and autophagy *in*  
729 *vivo*, but the main type of cell death is apoptosis. *In vitro*, VP3 of FMDV, PV and SVA was  
730 identified as inducer of apoptosis and autophagy. VP3, a component of picornavirus capsid,  
731 makes a substantial contribution to capsid stability and contains receptor recognition sites and  
732 important neutralizing epitopes (56). Which is also closely related to virulence and innate  
733 immune response. C-terminal aa 111-220 of FMDV-VP3 are essential for VP3 interaction with  
734 VISA to inhibit innate immune response (57). The His124 of serotype A FMDV-VP3 mutated to  
735 Asp increases viral acid resistance (58). The Arg56 of FMDV-VP3 is closely associated with  
736 virulence (59). The aa 59, 62, 67 and 176-190 of EV-71-VP3 are conformational neutralizing  
737 epitopes (60, 61). The function of other aa of VP3 is not clear. We found that FMDV-VP3  
738 significantly induces apoptosis and autophagy, and the Gly129 locates at a bend region of  
739 random coil structure is the apoptotic and autophagic function site. The mutation of Gly129  
740 may change the interaction between VP3 and its close amino acids around which. More

741 importantly, the Gly is conserved at the similar location of other picornaviruses, including CV,  
742 EV71, SVA and PV, indicating that the Gly of picornaviruses VP3 random coil has similar  
743 function that dependent on the special structure location.

744 Viruses usually modulate a key molecule to manipulate host cell death (40). How  
745 FMDV-VP3 triggers the apoptotic and autophagic pathway remains unclear. In the present  
746 study, VP3 specifically interacted with p53 in the cytoplasm both *in vivo* and *in vitro*. Intriguingly,  
747 the interaction and co-localization disappeared when Gly 129 was mutated. The tumor  
748 suppressor p53 is considered a key molecule in the regulation of apoptosis, autophagy and  
749 growth arrest in the cellular response to replicative and environmental stresses. (41, 62). The  
750 multifunction of p53 depending of its intracellular localization. Indeed, p53 is a  
751 well-characterized transcription factor that transactivates a number of genes related to  
752 apoptosis and autophagy, such as Bid (63), Bax (64), Fas (65), Noxa (66), Puma (67),  
753 damage-regulated autophagy modulator (Dram) (68), PTEN-induced kinase 1 (PINK1)(69)  
754 and *Isg20L1*(70). Indisputably, the sub-cellular location in which p53 performs the above  
755 function is the nucleus. However, in addition to its nuclear activity, it has also been reported  
756 that p53 directly interacts with viral proteins to trigger the p53-independent cell death pathway  
757 under certain circumstances. For instance, p53 interacts with the U14 protein of human  
758 herpesvirus and plays an important role in viral infection (71). The interaction between p53 and  
759 hepatitis B virus X protein results in the abrogation of apoptosis (72). The BM2 protein of  
760 influenza B virus interacts with p53 and blocks p53-mediated apoptosis (73). In addition,  
761 previous studies suggested that p53 can translocate from the nucleus to the cytoplasm (41,  
762 74). Here we demonstrated that VP3 contributes to p53 translocation from the nucleus into the  
763 cytoplasm. Challenge with rVP3/FMDV led to p53 co-localization with FMDV-VP3 in the  
764 cytoplasm of tissue cells. However, in the absence of the Gly129, p53 was predominantly  
765 localized to the nucleus, with no apparent co-localization between p53 and FMDV-VP3 in the  
766 tissues of rVP3-129/FMDV challenged guinea pigs.

767 We also found that p53 levels were increased in case of VP3 expression, and  
768 phosphorylation of p53 was promoted by VP3. More importantly, VP3-induced apoptosis and  
769 autophagy were significantly enhanced by p53 overexpression, but decreased by the p53  
770 specific inhibitor PFT- $\alpha$ . In response to stress, p53 undergoes post-translational

771 phosphorylation that is believed to regulate its accumulation and activation, and accumulation  
772 is prominently linked to mitochondrial translocation of p53 (75, 76). Under many stress  
773 conditions, p53 translocates to the mitochondria and directly interacts with critical Bcl2 related  
774 proteins, which regulate both apoptosis and autophagy, such as Bax, Bak, Bcl-XL, Bcl2 and  
775 Bad (42, 43, 77). Meanwhile, p53 has been suggested to function like a BH3-only protein in the  
776 mitochondria and induce mitochondrial outer membrane permeabilization, leading to the  
777 release of mitochondrial cytochrome c (78). As shown above, Bad was pulled down by p53 in  
778 the presence of VP3, which enables Bad to co-localize with p53 in the mitochondria both in  
779 HEK-293T cells and tissues of rVP3/FMDV challenged guinea pigs. Mutation of Gly 129  
780 greatly reduced the co-localization level of p53 and Bad. These results suggested that  
781 wild-type VP3 may act as an inducer of p53 translocation to the mitochondria and the  
782 interaction with Bad. In addition, we also validated that VP3 can upregulate Bad and ultimately  
783 resulting in apoptotic and autophagic cell death of host cells.

784 Apoptosis, autophagy and unfolded protein response are the main mechanisms involved in  
785 viral pathogenesis (44). In many viruses such as yellow head virus (79), mouse hepatitis virus  
786 (80) and Japanese encephalitis virus (81), virus induced apoptosis is considered a virulence  
787 factor and may promote viral pathogenicity and mortality (82-85). Influenza A virus induced  
788 apoptosis is a cause of organ damage (86). H5N1- or H1N1-induced distal lung epithelial cell  
789 apoptosis is a classical feature of acute respiratory disease syndrome (58). HIV-1-induced  
790 autophagy in different stages may stimulate or inhibit viral infection and pathogenesis (87-89).  
791 Whether VP3 of picornaviruses induced apoptosis and autophagy are relevant to biological  
792 characteristics of the virus remains unclear. Here, two recombinant viruses with VP3 Gly129  
793 mutated to Ala or not termed rVP3-129/FMDV and rVP3/FMDV, respectively, were rescued. In  
794 *in vitro* experiments, mutation of Gly129 significantly reduced the viral titer, apoptosis and  
795 autophagy levels. In *in vivo* experiments, guinea pigs, as a FMDV susceptible animal model,  
796 were challenged by the two recombinant viruses, and mutation of Gly129 directly contributed  
797 to diminished ability of the FMDV to induce apoptosis and autophagy in organs. However,  
798 whether the degree of VP3-induced apoptosis and autophagy are positively associated with  
799 organ damage remains unclear. The present results indicated that Gly129 mutation does not  
800 affect the internalization process of the FMDV. Therefore, VP3 Gly129 mutation significantly

801 relieved the clinical symptoms of the FMDV, while FMDV-specific antibody titers were  
802 negligibly affected. Furthermore, this mutation effectively alleviated the degree of damage in  
803 multiple organs. Taken together, these findings indicate that FMDV VP3-induced apoptosis  
804 and autophagy played crucial roles in FMDV virulence and pathogenicity.

805 In general, viral infection triggered apoptotic and autophagic cell death are regulated by the  
806 host's active defense system. The self-destructive apoptosis may cause abortion of  
807 unassembled virus. Since apoptotic cell death impedes viral replication, viruses, to maximize  
808 viral propagation, express anti-apoptotic proteins to delay or block apoptosis. This process  
809 makes more time for viral assembly and replication before the death of host cells (2, 90). Such  
810 apoptosis usually occurs at the early stage of infection and reduces viral replication (91-94).  
811 Moreover, a number of viruses that have not evolved anti-apoptotic or evasion mechanisms,  
812 including influenza virus, may encourage apoptosis to promote viral replication (95, 96). For  
813 example, Chikungunya virus triggers apoptosis and utilizes the resulting apoptotic blebs to  
814 circumvent host cell defense mechanisms, thereby facilitating viral dissemination and  
815 replication (97). Autophagy also acts as both anti-viral and pro-viral roles in viral infection. As a  
816 cell-intrinsic defensive mechanism, host cell may degrade viral components by autophagy  
817 pathway(98, 99). As a cellular survival mechanism, autophagy restrains the spread of virus  
818 from the primary infection site to adjacent uninfected cells (5, 98). For RNA virus,  
819 autophagosome as cellular membranous structure, generally serve as a platform for  
820 membrane-associated replication factories to replicate and assemble(6). In the present study,  
821 mutation of Gly 129 significantly reduced not only FMDV replication *in vivo* and *in vitro*, but  
822 also the viral load of the FMDV in pathogenic claw tissues. These results indicated that  
823 VP3-induced apoptosis and autophagy played critical role in promoting viral proliferation. As  
824 previously reported, many viruses use apoptosis to kill cells at the late stage of infection.  
825 During the process, progeny virions are encapsulated into apoptosis bodies and autophagic  
826 vesicles that rapidly infect the surrounding cells (100). In this manner, the virus can spread but  
827 could not be destroyed by virus-induced host's inflammatory response, immune response and  
828 protease digestion (2, 40). For instance, in order to promote viral spread, the Adenovirus E4 or  
829 F4 protein can kill cells at the end of the infectious cycle (101). Here we observed that Gly 129  
830 mutation significantly reduced the apoptotic and autophagic capacity of the FMDV at the mid

831 and late stages rather than the early stage of infection, suggesting that FMDV-VP3 induced  
832 apoptosis and autophagy occurs at the mid and late stages of infection, which could be a  
833 major approach for promoting the spread of viral progeny and infection of neighboring cells,  
834 thereby enhancing viral replication.

835 In summary, the FMDV VP3 protein directly interacts with p53 during infection, and  
836 promotes p53 translocation to the mitochondria and its interaction with Bad. This then triggers  
837 Bcl-2 family-dependent intrinsic apoptosis and LC3-dependent autophagy signaling pathway.  
838 The apoptosis and autophagy occurred at the mid and late stages of FMDV infection, thereby  
839 enhancing viral replication and pathogenicity. The apoptotic and autophagic function may be  
840 conserved amongst picornaviruses as the functional site Gly is conserved at the similarly  
841 location of other picornaviruses.

#### 842 **AVAILABILITY**

843 All relevant data are available from the corresponding authors upon request.

#### 844 **ACKNOWLEDGMENTS**

845 We thank the Facility Center Department, Lanzhou Veterinary Research Institute and Analysis  
846 and Test Group, Center for Technical Development and Analysis Service, Institute of Modern  
847 Physics, for helpful support.

#### 848 **FUNDING**

849 This work was supported by grants from the National Natural Sciences Foundation of China  
850 (no. 31672585, 31772717), the Project Supported by National Science and Technology  
851 Ministry (2015BAD12B04) and The Chinese Academy of Agricultural Science and Technology  
852 Innovation Project (CAAS-XTCX2016011-01 and Y2017JC55).

#### 853 **CONFLICT OF INTEREST**

854 The authors declare no competing financial interests.

## 855 REFERENCES

- 856 1. Everett H, McFadden G. Viruses and apoptosis: Meddling with mitochondria. *Virology*.  
857 2001;288(1):1-7.
- 858 2. Roulston A, Marcellus RC, Branton PE. Viruses and apoptosis. *Annual review of microbiology*.  
859 1999;53:577-628.
- 860 3. Fuchs Y, Steller H. Programmed Cell Death in Animal Development and Disease (vol 147, pg 742,  
861 2011). *Cell*. 2011;147(7):1640-.
- 862 4. Dreux M, Chisari FV. Viruses and the autophagy machinery. *Cell Cycle*. 2010;9(7):1295-307.
- 863 5. Liu Y, Schiff M, Czymmek K, Tallozy Z, Levine B, Dinesh-Kumar SP. Autophagy regulates  
864 programmed cell death during the plant innate immune response. *Cell*. 2005;121(4):567-77.
- 865 6. Gosert R, Kanjanahaluethai A, Egger D, Bienz K, Baker SC. RNA replication of mouse hepatitis  
866 virus takes place at double-membrane vesicles. *Journal of Virology*. 2002;76(8):3697-708.
- 867 7. Posthuma CC, Pedersen KW, Lu Z, Joosten RG, Roos N, Zevenhoven-Dobbe JC, et al. Formation of  
868 the arterivirus replication/transcription complex: a key role for nonstructural protein 3 in the  
869 remodeling of intracellular membranes. *Journal of Virology*. 2008;82(9):4480-91.
- 870 8. Wang RF, Zhu YX, Zhao JC, Ren CW, Li P, Chen HC, et al. Autophagy Promotes Replication of  
871 Influenza A Virus In Vitro. *Journal of Virology*. 2019;93(4):17.
- 872 9. Maiuri MC, Zalckvar E, Kimchi A, Kroemer G. Self-eating and self-killing: crosstalk between  
873 autophagy and apoptosis. *Nature Reviews Molecular Cell Biology*. 2007;8(9):741-52.
- 874 10. Nikolettou V, Markaki M, Palikaras K, Tavernarakis N. Crosstalk between apoptosis, necrosis  
875 and autophagy. *Biochimica Et Biophysica Acta-Molecular Cell Research*. 2013;1833(12):3448-59.
- 876 11. Chipuk JE, Green DR. Dissecting p53-dependent apoptosis. *Cell Death and Differentiation*.  
877 2006;13(6):994-1002.
- 878 12. Jo JH, Chung TM, Youn H, Yoo JY. Cytoplasmic parafibromin/hCdc73 targets and destabilizes p53  
879 mRNA to control p53-mediated apoptosis. *Nat Commun*. 2014;5:5433.
- 880 13. Haupt S, Berger M, Goldberg Z, Haupt Y. Apoptosis - the p53 network. *Journal of Cell Science*.  
881 2003;116(20):4077-85.
- 882 14. White E. Autophagy and p53. *Cold Spring Harb Perspect Med*. 2016;6(4):9.
- 883 15. Tuthill TJ, Groppelli E, Hogle JM, Rowlands DJ. Picornaviruses. *Curr Top Microbiol*.  
884 2010;343:43-89.
- 885 16. Croft SN, Walker EJ, Ghildyal R. Picornaviruses and Apoptosis: Subversion of Cell Death. *Mbio*.  
886 2017;8(5).
- 887 17. Buenz EJ, Howe CL. Picornaviruses and cell death. *Trends Microbiol*. 2006;14(1):28-36.
- 888 18. Hanson PJ, Ye X, Qiu Y, Zhang HM, Hemida MG, Wang F, et al. Cleavage of DAP5 by coxsackievirus  
889 B3 2A protease facilitates viral replication and enhances apoptosis by altering translation of  
890 IRES-containing genes. *Cell Death and Differentiation*. 2016;23(5):828-40.
- 891 19. Neznanov N, Kondratova A, Chumakov KM, Angres B, Zhumabayeva B, Agol VI, et al. Poliovirus  
892 protein 3A inhibits tumor necrosis factor (TNF)-induced apoptosis by eliminating the TNF receptor  
893 from cell surface. *Journal of Virology*. 2001;75(21):10409-20.
- 894 20. Barco A, Feduchi E, Carrasco L. Poliovirus protease 3C(pro) kills cells by apoptosis. *Virology*.  
895 2000;266(2):352-60.
- 896 21. Cong H, Du N, Yang Y, Song L, Zhang W, Tien P. Enterovirus 71 2B Induces Cell Apoptosis by  
897 Directly Inducing the Conformational Activation of the Proapoptotic Protein Bax (vol 90, pg 9862,



- 898 2016). *Journal of Virology*. 2018;92(7).
- 899 22. Li J, Yao Y, Chen Y, Xu X, Lin Y, Yang Z, et al. Enterovirus 71 3C Promotes Apoptosis through  
900 Cleavage of PinX1, a Telomere Binding Protein. *Journal of Virology*. 2017;91(2).
- 901 23. Lee YR, Wang PS, Wang JR, Liu HS. Enterovirus 71-induced autophagy increases viral replication  
902 and pathogenesis in a suckling mouse model. *J Biomed Sci*. 2014;21:11.
- 903 24. Chen DY, Feng CH, Tian XY, Zheng N, Wu ZW. Promyelocytic leukemia restricts enterovirus 71  
904 replication by inhibiting autophagy. *Frontiers in Immunology*. 2018;9:19.
- 905 25. Taylor MP, Kirkegaard K. Modification of cellular autophagy protein LC3 by poliovirus. *Journal of*  
906 *Virology*. 2007;81(22):12543-53.
- 907 26. Grubman MJ, Baxt B. Foot-and-mouth disease. *Clin Microbiol Rev*. 2004;17(2):465-+.
- 908 27. Huang MLH, Chiang S, Kalinowski DS, Bae D-H, Sahni S, Richardson DR. The Role of the  
909 Antioxidant Response in Mitochondrial Dysfunction in Degenerative Diseases: Cross-Talk between  
910 Antioxidant Defense, Autophagy, and Apoptosis. *Oxidative Medicine and Cellular Longevity*. 2019.
- 911 28. Chen T-A, Wang J-L, Hung S-W, Chu C-L, Cheng Y-C, Liang S-M. Recombinant VP1, an Akt Inhibitor,  
912 Suppresses Progression of Hepatocellular Carcinoma by Inducing Apoptosis and Modulation of CCL2  
913 Production. *Plos One*. 2011;6(8).
- 914 29. Peng JM, Liang SM, Liang CM. VP1 of foot-and-mouth disease virus induces apoptosis via the Akt  
915 signaling pathway. *The Journal of biological chemistry*. 2004;279(50):52168-74.
- 916 30. Wang J, Wang Y, Liu J, Ding L, Zhang Q, Li X, et al. A critical role of N-myc and STAT interactor (Nmi)  
917 in foot-and-mouth disease virus (FMDV) 2C-induced apoptosis. *Virus Res*. 2012;170(1-2):59-65.
- 918 31. Sun P, Zhang S, Qin X, Chang X, Cui X, Li H, et al. Foot-and-mouth disease virus capsid protein VP2  
919 activates the cellular EIF2S1-ATF4 pathway and induces autophagy via HSPB1. *Autophagy*.  
920 2018;14(2):336-46.
- 921 32. Mao RQ, Sun DH, Yang F, Tan H, Zhu ZX, Zheng HX, et al. Establishment and Evaluation of a Stable  
922 Bovine Thyroid Cell Line for Investigating Foot-and-Mouth Disease Virus. *Frontiers in Microbiology*.  
923 2018;9.
- 924 33. Zheng HX, Guo JH, Jin Y, Yang F, He JJ, Lv L, et al. Engineering Foot-and-Mouth Disease Viruses  
925 with Improved Growth Properties for Vaccine Development. *Plos One*. 2013;8(1):9.
- 926 34. Cong H, Du N, Yang Y, Song L, Zhang W, Tien P. Enterovirus 71 2B Induces Cell Apoptosis by  
927 Directly Inducing the Conformational Activation of the Proapoptotic Protein Bax. *Journal of Virology*.  
928 2016;90(21):9862-77.
- 929 35. Lian KQ, Yang F, Zhu ZX, Cao WJ, Jin Y, Liu HN, et al. The VP1 S154D mutation of type Asia1  
930 foot-and-mouth disease virus enhances viral replication and pathogenicity. *Infect Genet Evol*.  
931 2016;39:113-9.
- 932 36. Reid SM, Ferris NP, Hutchings GH, Zhang Z, Belsham GJ, Alexandersen S. Detection of all seven  
933 serotypes of foot-and-mouth disease virus by real-time, fluorogenic reverse transcription polymerase  
934 chain reaction assay. *J Virol Methods*. 2002;105(1):67-80.
- 935 37. Lian K, Yang F, Zhu Z, Cao W, Jin Y, Li D, et al. Recovery of infectious type Asia1 foot-and-mouth  
936 disease virus from suckling mice directly inoculated with an RNA polymerase I/II-driven unidirectional  
937 transcription plasmid. *Virus Res*. 2015;208:73-81.
- 938 38. Lian K, Yang F, Zhu Z, Cao W, Jin Y, Liu H, et al. The VP1 S154D mutation of type Asia1  
939 foot-and-mouth disease virus enhances viral replication and pathogenicity. *Infect Genet Evol*.  
940 2016;39:113-9.
- 941 39. Mori H, Cardiff RD. *Methods of Immunohistochemistry and Immunofluorescence: Converting*

- 942 Invisible to Visible. *Methods in molecular biology*. 2016;1458:1-12.
- 943 40. Hay S, Kannourakis G. A time to kill: viral manipulation of the cell death program. *The Journal of*  
944 *general virology*. 2002;83(Pt 7):1547-64.
- 945 41. Green DR, Kroemer G. Cytoplasmic functions of the tumour suppressor p53. *Nature*.  
946 2009;458(7242):1127-30.
- 947 42. Moll UM, Marchenko N, Zhang XK. p53 and Nur77/TR3 - transcription factors that directly target  
948 mitochondria for cell death induction. *Oncogene*. 2006;25(34):4725-43.
- 949 43. Jiang P, Du WJ, Heese K, Wu M. The bad guy cooperates with good cop p53: Bad is  
950 transcriptionally up-regulated by p53 and forms a bad/p53 complex at the mitochondria to induce  
951 apoptosis. *Molecular and Cellular Biology*. 2006;26(23):9071-82.
- 952 44. Iranpour M, Moghadam AR, Yazdi M, Ande SR, Alizadeh J, Wiechec E, et al. Apoptosis, autophagy  
953 and unfolded protein response pathways in Arbovirus replication and pathogenesis. *Expert reviews in*  
954 *molecular medicine*. 2016;18:e1.
- 955 45. Benedict CA, Norris PS, Ware CF. To kill or be killed: viral evasion of apoptosis. *Nature*  
956 *immunology*. 2002;3(11):1013-8.
- 957 46. Chiramel AI, Brady NR, Bartenschlager R. Divergent roles of autophagy in virus infection. *Cells*.  
958 2013;2(1):83-104.
- 959 47. Walker EJ, Younessi P, Fulcher AJ, McCuaig R, Thomas BJ, Bardin PG, et al. Rhinovirus 3C Protease  
960 Facilitates Specific Nucleoporin Cleavage and Mislocalisation of Nuclear Proteins in Infected Host Cells.  
961 *Plos One*. 2013;8(8).
- 962 48. Mukherjee A, Morosky SA, Delorme-Axford E, Dybdahl-Sissoko N, Oberste MS, Wang T, et al. The  
963 Coxsackievirus B 3C(pro) Protease Cleaves MAVS and TRIF to Attenuate Host Type I Interferon and  
964 Apoptotic Signaling. *Plos Pathogens*. 2011;7(3).
- 965 49. de Jong AS, de Mattia F, Van Dommelen MM, Lanke K, Melchers WJG, Willems PHGM, et al.  
966 Functional analysis of picornavirus 2B proteins: Effects on calcium homeostasis and intracellular  
967 protein trafficking. *Journal of Virology*. 2008;82(7):3782-90.
- 968 50. Jackson WT, Giddings TH, Taylor MP, Mulinyawe S, Rabinovitch M, Kopito RR, et al. Subversion of  
969 cellular autophagosomal machinery by RNA viruses. *Plos Biol*. 2005;3(5):861-71.
- 970 51. Wong J, Zhang JC, Si XN, Gao G, Mao I, McManus BM, et al. Autophagosome supports  
971 coxsackievirus B3 replication in host cells. *Journal of Virology*. 2008;82(18):9143-53.
- 972 52. Li MX, Tan IKL, Ma SB, Hockings C, Kratina T, Dengler MA, et al. BAK alpha 6 permits activation by  
973 BH3-only proteins and homooligomerization via the canonical hydrophobic groove. *Proceedings of the*  
974 *National Academy of Sciences of the United States of America*. 2017;114(29):7629-34.
- 975 53. Yang CY, Wang SM. Hydrophobic Binding Hot Spots of Bcl-xL Protein-Protein Interfaces by  
976 Cosolvent Molecular Dynamics Simulation. *ACS Med Chem Lett*. 2011;2(4):280-4.
- 977 54. Wu H, Zhai X, Chen Y, Wang RX, Lin LX, Chen SJ, et al. Protein 2B of Coxsackievirus B3 Induces  
978 Autophagy Relying on Its Transmembrane Hydrophobic Sequences. *Viruses-Basel*. 2016;8(5):11.
- 979 55. Ku BK, Kim SB, Moon OK, Lee SJ, Lee JH, Lyoo YS, et al. Role of apoptosis in the pathogenesis of  
980 Asian and South American foot-and-mouth disease viruses in swine. *The Journal of veterinary medical*  
981 *science*. 2005;67(11):1081-8.
- 982 56. Carrillo C, Tulman ER, Delhon G, Lu Z, Carreno A, Vagnozzi A, et al. Comparative genomics of  
983 foot-and-mouth disease virus. *J Virol*. 2005;79(10):6487-504.
- 984 57. Li D, Yang WP, Yang F, Liu HA, Zhu ZX, Lian KQ, et al. The VP3 structural protein of foot-and-mouth  
985 disease virus inhibits the IFN-beta signaling pathway. *Faseb Journal*. 2016;30(5):1757-66.

- 986 58. Biswal JK, Das B, Sharma GK, Khulape SA, Pattnaik B. Role of a single amino acid substitution of  
987 VP3 H142D for increased acid resistance of foot-and-mouth disease virus serotype A. *Virus genes*.  
988 2016;52(2):235-43.
- 989 59. Borca MV, Pacheco JM, Holinka LG, Carrillo C, Hartwig E, Garriga D, et al. Role of arginine-56  
990 within the structural protein VP3 of foot-and-mouth disease virus (FMDV) O1 Campos in virus  
991 virulence. *Virology*. 2012;422(1):37-45.
- 992 60. Jiang LP, Fan RJ, Sun SY, Fan P, Su WH, Zhou Y, et al. A new EV71 VP3 epitope in norovirus P  
993 particle vector displays neutralizing activity and protection in vivo in mice. *Vaccine*.  
994 2015;33(48):6596-603.
- 995 61. Kiener TK, Jia Q, Meng T, Chow VTK, Kwang J. A Novel Universal Neutralizing Monoclonal  
996 Antibody against Enterovirus 71 That Targets the Highly Conserved "Knob" Region of VP3 Protein. *Plos*  
997 *Neglect Trop Dis*. 2014;8(5):15.
- 998 62. Amaral JD, Xavier JM, Steer CJ, Rodrigues CM. The role of p53 in apoptosis. *Discovery medicine*.  
999 2010;9(45):145-52.
- 1000 63. Sax JK, Fei P, Murphy ME, Bernhard E, Korsmeyer SJ, El-Deiry WS. BID regulation by p53  
1001 contributes to chemosensitivity. *Nature cell biology*. 2002;4(11):842-9.
- 1002 64. Miyashita T, Reed JC. Tumor suppressor p53 is a direct transcriptional activator of the human bax  
1003 gene. *Cell*. 1995;80(2):293-9.
- 1004 65. Bennett M, Macdonald K, Chan SW, Luzio JP, Simari R, Weissberg P. Cell surface trafficking of Fas:  
1005 a rapid mechanism of p53-mediated apoptosis. *Science*. 1998;282(5387):290-3.
- 1006 66. Oda E, Ohki R, Murasawa H, Nemoto J, Shibue T, Yamashita T, et al. Noxa, a BH3-only member of  
1007 the Bcl-2 family and candidate mediator of p53-induced apoptosis. *Science*. 2000;288(5468):1053-8.
- 1008 67. Nakano K, Vousden KH. PUMA, a novel proapoptotic gene, is induced by p53. *Mol Cell*.  
1009 2001;7(3):683-94.
- 1010 68. Crighton D, Wilkinson S, O'Prey J, Syed N, Smith P, Harrison PR, et al. DRAM, a p53-induced  
1011 modulator of autophagy, is critical for apoptosis. *Cell*. 2006;126(1):121-34.
- 1012 69. Goiran T, Duplan E, Rouland L, El Manaa W, Lauritzen I, Dunys J, et al. Nuclear p53-mediated  
1013 repression of autophagy involves PINK1 transcriptional down-regulation. *Cell Death Differ*.  
1014 2018;25(5):873-84.
- 1015 70. Eby KG, Rosenbluth JM, Mays DJ, Marshall CB, Barton CE, Sinha S, et al. ISG20L1 is a p53 family  
1016 target gene that modulates genotoxic stress-induced autophagy. *Mol Cancer*. 2010;9.
- 1017 71. Takemoto M, Koike M, Mori Y, Yonemoto S, Sasamoto Y, Kondo K, et al. Human herpesvirus 6  
1018 open reading frame U14 protein and cellular p53 interact with each other and are contained in the  
1019 virion. *J Virol*. 2005;79(20):13037-46.
- 1020 72. Elmore LW, Hancock AR, Chang SF, Wang XW, Chang S, Callahan CP, et al. Hepatitis B virus X  
1021 protein and p53 tumor suppressor interactions in the modulation of apoptosis. *Proc Natl Acad Sci U S*  
1022 *A*. 1997;94(26):14707-12.
- 1023 73. Zhang H, Yu H, Wang J, Zhang M, Wang X, Ahmad W, et al. The BM2 protein of influenza B virus  
1024 interacts with p53 and inhibits its transcriptional and apoptotic activities. *Molecular and Cellular*  
1025 *Biochemistry*. 2015;403(1-2):187-97.
- 1026 74. Baptiste N, Prives C. p53 in the cytoplasm: a question of overkill? *Cell*. 2004;116(4):487-9.
- 1027 75. Nemaierova A, Erster S, Moll UM. The post-translational phosphorylation and acetylation  
1028 modification profile is not the determining factor in targeting endogenous stress-induced p53 to  
1029 mitochondria. *Cell Death Differ*. 2005;12(2):197-200.

- 1030 76. Meek DW. Post-translational modification of p53. *Semin Cancer Biol.* 1994;5(3):203-10.
- 1031 77. Manfredi JJ. p53 and apoptosis: it's not just in the nucleus anymore. *Mol Cell.* 2003;11(3):552-4.
- 1032 78. Mihara M, Erster S, Zaika A, Petrenko O, Chittenden T, Pancoska P, et al. p53 has a direct  
1033 apoptogenic role at the mitochondria. *Mol Cell.* 2003;11(3):577-90.
- 1034 79. Khanobdee K, Soowannayan C, Flegel TW, Ubol S, Withyachumnarnkul B. Evidence for apoptosis  
1035 correlated with mortality in the giant black tiger shrimp *Penaeus monodon* infected with yellow head  
1036 virus. *Diseases of aquatic organisms.* 2002;48(2):79-90.
- 1037 80. Chen BP, Lane TE. Lack of nitric oxide synthase type 2 (NOS2) results in reduced neuronal  
1038 apoptosis and mortality following mouse hepatitis virus infection of the central nervous system.  
1039 *Journal of neurovirology.* 2002;8(1):58-63.
- 1040 81. Sun J, Yu Y, Deubel V. Japanese encephalitis virus NS1' protein depends on pseudoknot secondary  
1041 structure and is cleaved by caspase during virus infection and cell apoptosis. *Microbes Infect.*  
1042 2012;14(11):930-40.
- 1043 82. Suja MS, Mahadevan A, Madhusudhana SN, Vijayasarithi SK, Shankar SK. Neuroanatomical  
1044 mapping of rabies nucleocapsid viral antigen distribution and apoptosis in pathogenesis in street dog  
1045 rabies--an immunohistochemical study. *Clinical neuropathology.* 2009;28(2):113-24.
- 1046 83. Collins M. Potential roles of apoptosis in viral pathogenesis. *American journal of respiratory and  
1047 critical care medicine.* 1995;152(4 Pt 2):S20-4.
- 1048 84. Hnatiuk S, Barry M, Zeng W, Liu L, Lucas A, Percy D, et al. Role of the C-terminal RDEL motif of the  
1049 myxoma virus M-T4 protein in terms of apoptosis regulation and viral pathogenesis. *Virology.*  
1050 1999;263(2):290-306.
- 1051 85. Ding X, Xu F, Chen H, Tesh RB, Xiao SY. Apoptosis of hepatocytes caused by Punta Toro virus  
1052 (Bunyaviridae: Phlebovirus) and its implication for Phlebovirus pathogenesis. *The American journal of  
1053 pathology.* 2005;167(4):1043-9.
- 1054 86. Li D, Wei J, Yang F, Liu HN, Zhu ZX, Cao WJ, et al. Foot-and-mouth disease virus structural protein  
1055 VP3 degrades Janus kinase 1 to inhibit IFN-gamma signal transduction pathways. *Cell Cycle.*  
1056 2016;15(6):850-60.
- 1057 87. Espert L, Denizot M, Grimaldi M, Robert-Hebmann V, Gay B, Varbanov M, et al. Autophagy is  
1058 involved in T cell death after binding of HIV-1 envelope proteins to CXCR4. *J Clin Invest.*  
1059 2006;116(8):2161-72.
- 1060 88. Denizot M, Varbanov M, Espert L, Robert-Hebmann V, Sagnier S, Garcia E, et al. HIV-1 gp41  
1061 fusogenic function triggers autophagy in uninfected cells. *Autophagy.* 2008;4(8):998-1008.
- 1062 89. Espert L, Varbanov M, Robert-Hebmann V, Sagnier S, Robbins I, Sanchez F, et al. Differential Role  
1063 of Autophagy in CD4 T Cells and Macrophages during X4 and R5 HIV-1 Infection. *Plos One.* 2009;4(6).
- 1064 90. McLean JE, Ruck A, Shirazian A, Pooyaei-Mehr F, Zakeri ZF. Viral manipulation of cell death.  
1065 *Current pharmaceutical design.* 2008;14(3):198-220.
- 1066 91. Zheng C, Zheng Z, Sun J, Zhang Y, Wei C, Ke X, et al. MiR-16-5p mediates a positive feedback loop  
1067 in EV71-induced apoptosis and suppresses virus replication. *Sci Rep.* 2017;7(1):16422.
- 1068 92. Lee CJ, Liao CL, Lin YL. Flavivirus activates phosphatidylinositol 3-kinase signaling to block  
1069 caspase-dependent apoptotic cell death at the early stage of virus infection. *J Virol.*  
1070 2005;79(13):8388-99.
- 1071 93. Chang P, Kuchipudi SV, Mellits KH, Sebastian S, James J, Liu J, et al. Early apoptosis of porcine  
1072 alveolar macrophages limits avian influenza virus replication and pro-inflammatory dysregulation. *Sci  
1073 Rep.* 2015;5:17999.

- 1074 94. Zhu C, Zheng F, Zhu J, Liu M, Liu N, Li X, et al. The interaction between NOLC1 and IAV NS1  
1075 protein promotes host cell apoptosis and reduces virus replication. *Oncotarget*. 2017;8(55):94519-27.  
1076 95. McLean JE, Datan E, Matassov D, Zakeri ZF. Lack of Bax prevents influenza A virus-induced  
1077 apoptosis and causes diminished viral replication. *J Virol*. 2009;83(16):8233-46.  
1078 96. Tran AT, Cortens JP, Du Q, Wilkins JA, Coombs KM. Influenza virus induces apoptosis via  
1079 BAD-mediated mitochondrial dysregulation. *J Virol*. 2013;87(2):1049-60.  
1080 97. Krejbich-Trotot P, Denizot M, Hoarau JJ, Jaffar-Bandjee MC, Das T, Gasque P. Chikungunya virus  
1081 mobilizes the apoptotic machinery to invade host cell defenses. *FASEB journal : official publication of*  
1082 *the Federation of American Societies for Experimental Biology*. 2011;25(1):314-25.  
1083 98. Liang XH, Kleeman LK, Jiang HH, Gordon G, Goldman JE, Berry G, et al. Protection against fatal  
1084 Sindbis virus encephalitis by Beclin, a novel Bcl-2-interacting protein. *Journal of Virology*.  
1085 1998;72(11):8586-96.  
1086 99. Talloczy Z, Virgin HW, Levine B. PKR-dependent autophagic degradation of herpes simplex virus  
1087 type 1. *Autophagy*. 2006;2(1):24-9.  
1088 100. Bird SW, Maynard ND, Covert MW, Kirkegaard K. Nonlytic viral spread enhanced by autophagy  
1089 components. *Proceedings of the National Academy of Sciences of the United States of America*.  
1090 2014;111(36):13081-6.  
1091 101. Muller U, Kleinberger T, Shenk T. Adenovirus E4orf4 protein reduces phosphorylation of c-Fos  
1092 and E1A proteins while simultaneously reducing the level of AP-1. *J Virol*. 1992;66(10):5867-78.
- 1093
